# Supplementary material for: Single-cell nascent RNA sequencing unveils coordinated global transcription
Source: PubMed Central journal article supplement (PMC11222150; doi:10.1038/s41586-024-07517-7), 2024-06-05
Supplement: 41586_2024_7517_MOESM3_ESM.pdf [file 41586_2024_7517_MOESM3_ESM.pdf]

## Peer Review File

**Manuscript Title:** Single-cell nascent RNA sequencing unveils coordinated global transcription

### Reviewer Comments & Author Rebuttals

#### Redactions – Third Party Material

Parts of this Peer Review File have been redacted as indicated to remove third-party material.

#### Reviewer Reports on the Initial Version:

Referees' comments:

Referee #1 (Remarks to the Author):

In this manuscript, Mahat et al. developed two new methodologies for profiling nascent transcription: the first is an Assay of Genome-wide Transcriptome using Click chemistry (AGTuC) to join nascent RNAs labeled by a run-on reaction with 3'-(O-Propargyl)-NTPs in mESCs; the second also uses a nuclear run-on reaction with 3'-(O-Propargyl)-NTPs in absence of sarkosyl after which nuclei are sorted individually into 96-well plates and processed to produce a single cell GRO-seq (scGRO-seq). The first AGTuC assay is described as a means of doing PRO-seq on 1200 cells or possibly less (depending on coverage needs) in a protocol that takes only 8 hrs. This technical improvement of the PRO/GRO-seq protocol will make applications of GRO/PRO-seq applicable to more researchers, especially those working in systems where large cell numbers are difficult to obtain. The second provides a long sought single cell assay of transcribing RNA Polymerase II (Pol II)

The authors then use this scGRO-seq to uncover several features of transcriptional dynamics at the single-cell level. Employing the scGRO-seq assay, the authors identified and characterized the dynamics of transcription bursts, unveiled the co-transcription of functionally related genes, and they showed that the bursting of transcription at super-enhancers precedes the transcription of target genes. Identification of these transcription characteristics using scGRO-seq can greatly enhance our fundamental understanding of transcription mechanisms, including coordinated regulation between enhancers and target gene expression, which is very challenging to interrogate using existing bulk nascent transcriptomic assays. However, the current version of the method captures a very small fraction (less than 10%) of the nascent transcripts from transcriptionally highly-active, cultured mouse embryonic stem cells, and therefore, interpreting some of the presented data and applying the current version of the method to other transcriptionally less active cell types could be challenging. This and other concerns listed below need to be addressed.

#### Major comments

1. Since the scGRO-seq captured a very small fraction (estimated at 10%) of actively engaged Pol II, it would be valuable to provide details on the types of regions captured by scGRO-seq. Of course, the authors already acknowledge that promoter-proximal paused Pol II is not efficiently captured by scGRO-seq, and the overall correlation of inAGTuC and PRO-seq is reasonably good as shown in Extended Data Fig. 4h ( $r^2=.65$ ). However, the absence of sarkosyl could potentially affect run-on reactions differentially across the specific regions of the genome: genes in more chromatin-open regions might be preferentially run-on transcribed; or highly expressed genes might offer more efficient run-on reactions than lowly expressed genes. Additionally, the authors could perform run-on with O-propargyl nucleotides in inAGTuC conditions, remove nucleotides and wash the nuclei,

then provide biotin-NTP under PRO-seq conditions (0.5% Sarkosyl). Sequencing the resulting biotin-nascent RNAs should reveal only paused Pol II, if indeed all the gene body RNA polymerases were already run-on and chain terminated. Such comparisons could be reassuring to users of the method or help clarify the types of specific questions that can be most rigorously addressed.

2. To demonstrate the method's potential for dissecting cellular heterogeneity using nascent transcription, the authors should use at least one heterogeneous cell population. For example, performing scGRO-seq on mouse ES cells differentiating into specific lineages (e.g., neural differentiation) could assess the method's utility in deciphering cellular and functional heterogeneity, which are fundamental applications for any single-cell methodology. Alternatively, an scGRO-seq analysis of a simple reconstructed, defined mix of different cell types, which show a range of relatedness, would help assess the effectiveness of the methodology.

3. The low capturing efficiency, combined with the technical inability of the scGRO-seq to detect promoter-proximal Pol II signal, limits the interpretation of bursting kinetics. The authors mention that highly paused genes exhibit higher burst frequency. How do the authors reconcile the concept of a burst phase with pause-release? Is bursting size and bursting frequency related to features of gene regulation that suggest these bursting properties are modulated at Pol II recruitment or pause-release? The authors do some analysis of core promoter elements, but do genes and promoters with similar burst sizes or frequencies share any functional or structural similarities?

4. The authors' explanation for the superiority of scGRO-seq over scRNA-seq for classifying cells based on their cell cycle phase is not entirely convincing. Recent versions of scRNA-seq methods are not dependent on polyadenylation of the transcript, and they can efficiently capture non-polyadenylated transcripts including histone genes (VASA-seq by Salmen et al, 2022 and STRS by McKellar et al, 2023). The authors should consider revising the text and conclusions where appropriate. Additionally, they could perform UMAP analysis to determine if cells can be clustered into distinct groups based on the cell cycle profile.

5. The manuscript's most critical findings are co-transcription of functionally related genes and temporal coordination between genes and enhancers, which can't be confidently dissected using existing bulk nascent transcriptomic methods and require nascent transcription profiling at single cell level, as perfectly employed by the authors. However, presentations of these findings need to be supported by assessment of variations between individual cells. Figures 4 and 5, along with associated supplementary figures, do not adequately highlight these variations. For example, the authors should indicate what fraction of cells exhibit co-transcription for specific processes and provide genome browser tracks illustrating co-transcribing genes in specific individual cells but not in others. The same approach should be applied to enhancer-promoter pairs in Figure 5.

#### Minor Comments

1. Given its single base-pair resolution nature due to the incorporation of a single chain-terminating O-Propargyl clickable nucleotide during the run-on reaction, we suggest the single-cell assay should be called single-cell click-based PRO-seq (sccPRO-seq). Also, instead of introducing too many acronyms, we suggest the following alternative names for the other two assays: for the AGTuC assay consider Click-based PRO-seq (cPRO-seq or PROclick-seq): and for inAGTuC assay, consider intact

nuclei Click-based PRO-seq (incPRO-seq).

2. While the authors effectively demonstrate the efficiency of cycloaddition using 3'-O-Propargyl-ATP and its reverse transcription, it remains unclear how efficiently Pol II incorporates O-Propargyl-NTPs compared to Biotin-NTPs. What fraction of O-Propargyl RNA is coupled with Azide-DNA via Click-chemistry?

Referee #2 (Remarks to the Author):

The manuscript from Mahat et al. describes the development of a bioorthogonal approach to bar tag immature RNA molecules for amplification and single cell sequencing. The impact of this approach is the ability to detect immature RNAs, which are typically hard to amplify given the lack of a functional handle like the poly-A tail of mature RNAs. The chemistry is an extension of "Click Code Seq," which was developed for looking at sites of base excision repair (J. Am. Chem. Soc. 140 (31): 9783–9787). Assuming that the click chemistry and RT-PCR read through of the resulting triazole are both consistent for different RNAs (see comment below), this tool is a powerful method for performing experiments that were quite difficult to do in the past, several of which they explore including co-transcription of genes and enhancers, histone transcription, etc. I believe that this method could be very useful and would support publication after the authors respond to my comments.

Comment #1 - The authors don't appear to have referenced the Click Code Seq paper mentioned above. I may have missed it, but if I didn't they should mention this technique and reference the paper.

Comment #2 - The CuAAC and RT-PCR steps do not go to 100%. Therefore, the reliability of the data should be dependent on the efficiency of these steps being the same across experiments and at each propargyl-dNTP. However, it appears that the authors only tested these step with propargyl-dATP on the RNA (Extended Data Figure 1). While I agree that the CuAAC is not likely to be dependent on the nature of the base, the same might not be true for RT-PCR. I suggest that the authors use their best conditions and confirm that the nature of the propargyl-dNTP does not alter the efficiency of either of these two steps.

Referee #3 (Remarks to the Author):

Mahat et al present scGRO-seq, an exciting new technique to study nascent transcription in single cells. Similar to GRO-seq or Pro-seq, this technique resolves the positions of individual transcriptionally engaged polymerases with base-pair resolution, but it is the first approach to provide also single cell resolution. This clearly is a methodological breakthrough and of major interest to many fields of research. However, some of the computational analyses must be developed further and better explanations are necessary. As presented, I am not yet fully convinced that the data quality is sufficiently high to provide quantitative estimates of transcriptional bursting and to "investigate the mechanisms of transcription regulation and the role of enhancers in gene

expression" as claimed in the abstract.

Major concerns:

1. The capture efficiency is not only per se an interesting parameter of scGRO-seq, the estimate (10%) obtained here is also critical to the analyses regarding "evidence of bursting de novo without prior assumptions" and the estimation of burst sizes and frequencies. The authors describe two ways to derive the capture efficiency. The first way is based on the comparison to intron seqFISH shown in Fig. 1f. Here, I have two concerns:

a. The capture efficiency of 10% is taken to be the probability of \*any Pol2\* that currently transcribes a gene to be detected by scGRO-seq. This would only be valid if only scGRO-seq reads were considered corresponding to Pol2 that transcribed the intron during that time the intron is not yet degraded. I give an example: For the sake of the argument let's say the capture efficiency of intron seqFISH is 100%, we have a 100kb gene, and the intron is immediately degraded after co-transcriptional splicing within 1 min after splicing. Further, let's say we have on average 1 intron per cell detected, and 0.23 scGRO-seq reads per cell (in the whole gene body) on average. In this simplified example, we thus have, on average, \*one\* Pol2 in the region 2.5kb after the FISH probes of the gene (this also depends on where in the intron the probes are). This means that we have 40 Pol2 currently transcribing the gene (in the whole gene body) per cell on average. The probability to detect a Pol2 is not 23%, it is 0.006%. In summary, this estimate of capture efficiency depends on the intron splicing kinetics and the length of the gene. If splicing is indeed co-transcriptional, the capture efficiency being the above mentioned probability is overestimated.

b. The 23% are apparently taken from the linear regression shown in Fig. 1f. I think I understand the basic idea ( $y=0.23x$ , if  $y$  is scGRO-seq reads and  $x$  is detected introns per cell). I do not understand why an intercept term was fitted and how to interpret it. Even more importantly: The fit was apparently done on the log-log plot, i.e.  $\log(y)=0.23 \log(x)$ , which means  $y=x^{0.23}$ . Why this is related to the capture efficiency is not clear to me.

2. The second way to estimate capture efficiency is based on a measurement of the number of engaged Pol2 in HeLa cells from 1996 and makes several risky assumptions (20% of Pol2 is in paused state - Reference missing; the number of active Pol2 is proportional to the genome size - why should this be the case; HeLa cells are 2.2 times more transcriptionally active than mESCs - this is based on a computational comparison of tumor vs normal RNA-seq samples with the mean factor being 2.2, but depending on the samples studied, with varying factors of 0.5 to 8; this did not include a comparison of cancer-derived cell lines such as HeLa, nor embryonic stem cells, which might indeed be more active than somatic tissue cells). Thus, how accurate the 10% capture efficiency actually is, is not clear. This is important for its usage in the analyses done in the manuscript.

3. The authors use their data to assess "evidence of bursting de novo without prior assumptions" by analysing the number of "multiplets" (genes with more than one read in a cell). The actually observed multiplets are compared to the ones observed after a simple permutation approach (for each read, maintain the gene, but assign a random cell). The permutations do not respect that cells are from different batches with quite different average read depths. After the permutation approach, all cells will have around the same number of reads. If multiplets predominantly occur in cells with many reads (which seems likely to me), doing the permutation globally would reduce the

occurrence of multiplets. The authors should adapt their permutation approach such that the total read number is maintained for each cell (and it is not sufficient to perform the same permutation within batches, since also within a batch the read numbers are quite heterogeneous).

4. From the permutation approach (see 3.), the authors conclude that the occurrence of multiplets is 2.4% higher than expected by chance. From the 10% capture efficiency estimate, the authors conclude that "the probability of detecting two consecutive RNA polymerases on a gene is 1%". This 1% is then compared to the 2.4%. I need more explanations as to why this comparison is relevant (a probability vs. a relative increase over expectation; two consecutive Pol2 vs. more than 1 observed from potentially much more Pol2).

5. scGRO-seq was used to estimate bursting parameters.

a. The simulation that is used to validate the estimates seems unrealistic: Once the number of bursts are simulated, they are "scaled" by the burst size, i.e. always the mean burst size is taken per burst, instead of drawing it randomly from an appropriate distribution. The variance of data simulated by this will therefore be much smaller than in reality.

b. Even according to these simulations, the estimators used are strongly biased (Ext Fig 8b, linear regression  $y=0.96+0.64x$ ,  $y$  being the estimated burst size,  $x$  being the simulated burst size; for an unbiased estimator,  $y=x$ ).

c. Why are the results in Ext Fig. 8b and d so different? I appreciate that the true parameters ( $x$  axis) in d are obtained from the estimates from the data (instead of a normal distributions as in b), but why are the corresponding estimates qualitatively that different?

6. scGRO-seq was used to assess "whether these genes are transcriptionally synchronized" (as opposed to "co-expression" of "accumulated mRNA"). I am not convinced that the data and in particular the analyses done (focus on 10kb at the start of the gene body) allow conclusions about "transcriptional coordination between any gene pair or network of genes":

a. Analyses are done on binarized matrices. While Pearson correlation can be used with binary variables, the t test computed by `cor.test` in R assumes normally distributed variables and should not be used (there are alternatives, such as chi-square statistics).

b. According to the text, an "empirical false-discovery rate" is also used to filter. The permutation approach to estimate this suffers from the same flaw as mentioned above (see concern 3). Here the authors say "The permutation method accounts for several unknown and known biases, such as read depth per cell." If just "cell IDs" are shuffled, how is this accounted for? The authors should adapt their permutation approach such that the total read number is maintained.

c. The empirical p value is derived from 1000 permutations. This is not corrected for multiple testing (and much more permutations would be necessary to apply Benjamini-Hochberg or similar).

d. In the end the argument is based on testing for association of two binary variables. Even if the authors had accounted for confounding factors, if there is a subset of the cells where the gene is expressed, and not expressed in the others (e.g. as it is expected for cell cycle genes), association would not necessarily mean "transcriptional coordination": Take any pair of genes (not correlated at all), and add more and more cells where both genes are 0. At some point there will be a highly

significant association. Clearly this does not mean that their expression is synchronized in single cells, just that they are co-expressed in the same subset of the cells. It is therefore not surprising that circadian and cell cycle related genes come out of that analysis. Thus, as presented, scGRO-seq data do not bring benefits over data of "accumulated RNA".

7. All these concerns also apply to the association of gene-enhancer pairs that were analyzed using the same methodology.

8. \*Four\* super enhancers have correlations in the first few 5kb bins with the first few 5kb bins of their genes that might suggest that transcription at enhancers precedes transcription of the gene. The result section rightfully is careful about this: "However, any conclusions will require a much deeper data set." However, the abstract says that this "indicates that the bursting of transcription at super-enhancers precedes the burst from associated genes", and the end of the introduction mentions "preliminary evidence for the transcription initiation at enhancers before the transcription activation". These two statements are not backed by convincing data and should be removed.

Additional concerns:

- The start of the results section is very dense. It (I think rightfully) introduces AGTuC and inAGTuC, but it refers to 5 full page Extended Figures before the first main figure is presented. There is no description of the results in these figures (except for the very short figure legends) and no discussion. I suggest to add this in a supplementary document.
- The differences of inAGTuC and scGRO-seq profiles along gene bodies in Fig 1b to PRO-seq profiles are attributed to the absence of high concentrations of a strong detergent. The authors cite the groHMM paper here, which likely is the wrong reference?
- Ext Fig. 5 says 12, 120 and 1200 cells, text says 100k, 10k and 1k nuclei.
- The text always talks about "reads", while I believe it is "deduplicated reads". I suggest to refer to them as UMIs.
- The manuscript shows a lot of log-log scatterplots. It is not clear where the zeros are (pseudocounts?), and what the colorscale is showing.
- Line 149f: Please show the correlation excluding the promoter-proximal region!
- Fig 1f: "Intron seqFISH (reads per cell)"; it is not reads!
- Fig 1g: It is not clear which scRNA-seq data set that is.
- It is not described how the fdrs in "evidence for bursting" for the data from Fig 2b were estimated.
- Fig 2c: How was a KS test computed from this? Why does the x axis stop at 2.5kb if the window is 10kb?
- Line 227f: "Genes with the TATA element exhibited a larger burst size than genes lacking it, and the presence of the Initiator sequence further increased the burst size" - p values are required to back this claim.
- Fig 5a: How were KS tests performed? Why is there a drop by 50% in the left most bin for uncorrelated pairs?

- Methods: Better descriptions of the computational approaches in general are required. One example: The provided code hints at a custom definition of transcriptional units using groHMM, this is not described. Other example: Were there cells that were filtered out? (Based on Fig. 1c it seems as if cells were filtered by a threshold on features per cell - it true, reporting 1503 features on average per cell is not reasonable).

## Author Rebuttals to Initial Comments:

### Single-cell nascent RNA sequencing using click-chemistry unveils coordinated transcription

Referee expertise:

Referee #1: transcription, nascent RNA sequencing

Referee #2: click chemistry

Referee #3: single-cell analysis

#### Note:

Figures in the manuscript are referred to as they are in the manuscript.

Figures prepared to respond to the reviewer's comments are denoted by **R1** for **Referee #1**, **R2** for **Referee #2**, and **R3** for **Referee #3**.

#### Referee #1 (Remarks to the Author):

In this manuscript, Mahat et al. developed two new methodologies for profiling nascent transcription: the first is an Assay of Genome-wide Transcriptome using Click chemistry (AGTuC) to join nascent RNAs labeled by a run-on reaction with 3'-(O-Propargyl)-NTPs in mESCs; the second also uses a nuclear run-on reaction with 3'-(O-Propargyl)-NTPs in absence of sarkosyl after which nuclei are sorted individually into 96-well plates and processed to produce a single cell GRO-seq (scGRO-seq). The first AGTuC assay is described as a means of doing PRO-seq on 1200 cells or possibly less (depending on coverage needs) in a protocol that takes only 8 hrs. This technical improvement of the PRO/GRO-seq protocol will make applications of GRO/PRO-seq applicable to more researchers, especially those working in systems where large cell numbers are challenging to obtain. The second provides a long-sought single-cell assay of transcribing RNA Polymerase II (Pol II). The authors then use this scGRO-seq to uncover several features of transcriptional dynamics at the single-cell level. Employing the scGRO-seq assay, the authors identified and characterized the dynamics of transcription bursts, unveiled the co-transcription of functionally related genes, and they showed that the bursting of transcription at super-enhancers precedes the transcription of target genes. Identification of these transcription characteristics using scGRO-seq can significantly enhance our fundamental understanding of transcription mechanisms, including coordinated regulation between enhancers and target gene expression, which is very challenging to interrogate using existing bulk nascent transcriptomic assays. However, the current version of the method captures a very small fraction (less than 10%) of the nascent transcripts from transcriptionally highly active, cultured mouse embryonic stem cells, and therefore, interpreting some of the presented data and applying the current version of the method to other transcriptionally less active cell types could be challenging. This and other concerns listed below need to be addressed.

We thank the reviewer for their insightful comments and for their time to review our manuscript. We are grateful for their recognition of the potential our new methodologies hold to enhance the fundamental understanding of transcription mechanisms.

We acknowledge the reviewer's concern regarding the capture efficiency of nascent transcripts and understand the significance of these issues for the robustness and generalizability of our techniques. While the capture efficiency achieved in this study has



47 room for improvement, like the first publication of every other single-cell method, it has  
48 enabled the exploration of nascent RNA and transcriptional mechanisms at the single-  
49 cell level for the first time. The field of nascent transcription is acutely aware of the  
50 challenges in capturing nascent RNA molecules. This difficulty primarily stems from the  
51 lower abundance of nascent RNA per cell, which is about one-tenth that of mRNA  
52 molecules(Cui and Irudayaraj, 2015; Marinov et al., 2014; Shah et al., 2018). Therefore,  
53 it is not surprising that it took us 15 years since the development of the first nascent RNA  
54 sequencing method(Core et al., 2008) to develop the single-cell version. In contrast,  
55 scRNA-seq(Tang et al., 2009) and scATAC-seq(Buenrostro et al., 2015) were developed  
56 more quickly following their respective bulk versions(Bainbridge et al., 2006; Buenrostro  
57 et al., 2013).

58  
59 It is also important to note that the capture efficiency of scGRO-seq aligns with that of the  
60 mRNA capture efficiency in scRNA-seq methods. For instance, in the landmark Drop-seq  
61 scRNA-seq method(Macosko et al., 2015), the estimated capture efficiency of mRNA per  
62 cell was approximately 12.8%. This efficiency decreased to 10.7% when assessed with  
63 independent digital expression measurements using droplet digital PCR.

64  
65 Even though the initial scRNA-seq and scATAC-seq studies presented findings with  
66 limited throughput and coverage, they nevertheless set the stage for subsequent  
67 improvements. We similarly anticipate progressive enhancements in scGRO-seq's  
68 throughput, capture efficiency, and applicability through the contributions of the broader  
69 scientific community in the coming years.

70  
71 Major comments:

72 1. Since the scGRO-seq captured a very small fraction (estimated at 10%) of actively  
73 engaged Pol II, it would be valuable to provide details on the types of regions captured  
74 by scGRO-seq. Of course, the authors already acknowledge that promoter-proximal  
75 paused Pol II is not efficiently captured by scGRO-seq, and the overall correlation of  
76 inAGTuC and PRO-seq is reasonably good as shown in Extended Data Fig. 4h  
77 ( $r^2=0.65$ ). However, the absence of sarkosyl could potentially affect run-on reactions  
78 differentially across the specific regions of the genome: genes in more chromatin-open  
79 regions might be preferentially run-on transcribed; or highly expressed genes might  
80 offer more efficient run-on reactions than lowly expressed genes. Additionally, the  
81 authors could perform run-on with O-propargyl nucleotides in inAGTuC conditions,  
82 remove nucleotides and wash the nuclei, then provide biotin-NTP under PRO-seq  
83 conditions (0.5% Sarkosyl). Sequencing the resulting biotin-nascent RNAs should  
84 reveal only paused Pol II, if indeed all the gene body RNA polymerases were already  
85 run-on and chain terminated. Such comparisons could be reassuring to users of the  
86 method or help clarify the types of specific questions that can be most rigorously  
87 addressed.

88 We appreciate the reviewer's insight regarding potential variability in run-on  
89 transcription efficiency across genomic regions. Following this suggestion, we  
90 assessed the run-on efficiency as a function of chromatin accessibility, categorizing  
91 genes into four bins based on ATAC-seq-derived chromatin accessibility from mouse  
92 embryonic stem cell data obtained from a recent study(Hu et al., 2022). We analyzed

93 the correlation between inAGTuC (0.025% sarkosyl) and PRO-seq (0.5% sarkosyl)  
94 across these gene groups, similar to the data presented in **Extended Data Figure 4h**  
95 of the original manuscript. We rationalized that if genes with higher chromatin  
96 accessibility have higher run-on efficiency at 0.025% sarkosyl, then we would observe  
97 a better correlation with PRO-seq. Our findings, detailed in **Figure R1.1.1**, indicate  
98 that genes with more open chromatin did not consistently exhibit increased run-on  
99 efficiency.

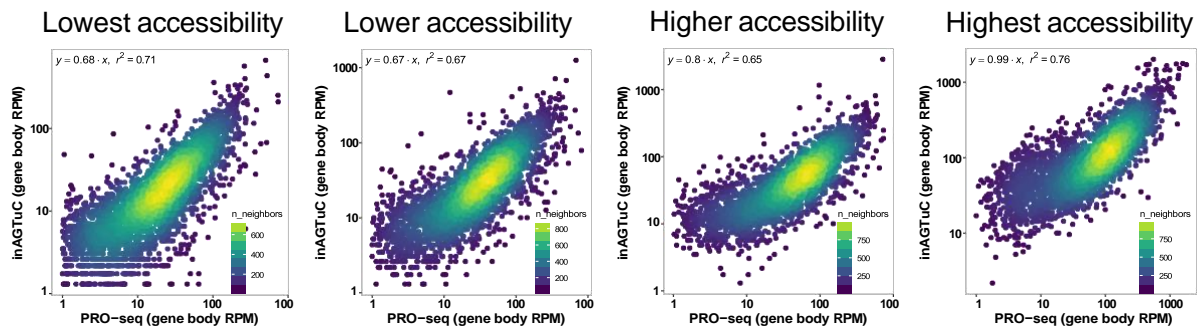

**Figure R1.1.1. Assessment of run-on efficiency on genes with various degree of chromatin openness.**

100 Our findings corroborate a previous study's results regarding sarkosyl's impact on  
101 transcription run-on efficiency. **Figure R1.1.2** (adapted from (Core et al., 2012))  
102 illustrates that run-on efficiency on the bodies of genes remains unaffected by the  
103 presence or absence of sarkosyl (**Figure R1.1.2D**). However, run-on efficiency without  
104 sarkosyl is reduced at the 5' ends of genes, as depicted in **Figure R1.1.2C**, likely  
105 attributable to the role of sarkosyl in allowing RNA polymerase to run-on by dislodging  
106 the transcriptional pausing factors like NELF and DSIF. Because of this reduced run-  
107 on efficiency at the 5' ends of genes, we excluded single-cell GRO-seq reads from the

#### Redactions – Third Party Material

- A. The composite profile of GRO-seq data shows the density reads in 10bp windows from 200bp to +500bp relative to TSSs for run-ons performed with or without sarkosyl. The Y-axis represents read/window/million reads sequenced. The number of genes shown is 11,800.
- B. Schematic showing how GRO-seq signal was quantified at promoters, the gene body, or at gene ends.
- C. Scatter plots showing the effects of sarkosyl on the run-on signal in promoters.
- D. Scatter plots showing the effects of sarkosyl on the run-on signal in genes.

108 initial 500 nucleotides of genes in our analysis to avoid misrepresentation due to  
109 decreased labeling of nascent RNA. This exclusion is a more cautious measure than  
110 the referenced study by an additional 200 nucleotides (**Figure R1.1.2B**). Nonetheless,  
111 the run-on efficiency appears consistent for RNA Polymerase II molecules post-  
112 promoter-proximal pause, as shown in **Figures R1.1.2A & R1.1.2D**.

113  
114 In regard to the reviewer's suggestion of "perform run-on with O-propargyl nucleotides  
115 in inAGTuC conditions, remove nucleotides and wash the nuclei, then provide biotin-  
116 NTP under PRO-seq conditions," while this experiment could capture paused and  
117 elongating Pol II, it would still be limited to bulk cell analysis, as the reviewer notes.  
118 We and others have not established a technique to isolate biotinylated RNA from  
119 single cells with sufficient efficiency. We acknowledge the reviewer's concerns  
120 regarding the underrepresentation of paused RNA Polymerase II (Pol II) in our  
121 scGRO-seq data, but the study of pause regulation is beyond the scope of this study.  
122 Developing such methodologies would be time- and resource-intensive, making it  
123 difficult to justify within the scope of this study.

- 124  
125 2. To demonstrate the method's potential for dissecting cellular heterogeneity using  
126 nascent transcription, the authors should use at least one heterogeneous cell  
127 population. For example, performing scGRO-seq on mouse ES cells differentiating  
128 into specific lineages (e.g., neural differentiation) could assess the method's utility in  
129 deciphering cellular and functional heterogeneity, which are fundamental applications  
130 for any single-cell methodology. Alternatively, a scGRO-seq analysis of a simple  
131 reconstructed, defined mix of different cell types, which show a range of relatedness,  
132 would help assess the effectiveness of the methodology.

133 Dissecting cellular heterogeneity is an important feature of single-cell RNA  
134 sequencing experiments. To demonstrate scGRO-seq's capability, we utilized  
135 asynchronous mouse embryonic stem cells, capturing cells in different cell cycle  
136 stages, as shown in **Figure 3**. It's noteworthy that mouse embryonic stem cell cycle  
137 stages are challenging to deduce using scRNA-seq, a fact underscored by a landmark  
138 scRNA-seq study (Klein et al., 2015), which observed: "single-cell data do not reveal  
139 broader evidence of cell-cycle-dependent transcription in ES cells." Unlike most  
140 scRNA-seq, scGRO-seq leverages replication-dependent histone genes and  
141 transcriptionally verified gene sets specific to cell cycle stages, thus offering insights  
142 into cell cycle and cellular heterogeneity.

143  
144 Moreover, the focus of this manuscript is on biological insights into the dynamics of  
145 transcriptional burst kinetics, the co-transcriptional regulation of genes, and the  
146 coordination between genes and enhancers under steady-state conditions. We,  
147 therefore, avoided the introduction of external perturbations. Delineating cellular  
148 heterogeneity in tissues or *in vitro* differentiated cells, such as differentiating ES cells  
149 into specific lineages like neural differentiation, as suggested by the reviewer, would  
150 require considerable methodological improvements in scGRO-seq's throughput in  
151 order to encompass the full spectrum of heterogeneity. However, scGRO-seq is  
152 currently a low-throughput method - similar to the first reports of single-cell assays,  
153 such as scRNA-seq (Tang et al., 2009) (hundreds of individual blastomeres) and

154 scATAC-seq(Buenrostro et al., 2015) (few hundred homogeneous tissue culture  
155 cells). We expect that the scGRO-seq method will see continuous improvements in its  
156 capacity for processing large numbers of cells and its effectiveness in capturing a  
157 higher fraction of nascent RNA through the contributions of the wider scientific  
158 community.

- 159
- 160 3. The low capturing efficiency, combined with the technical inability of the scGRO-seq  
161 to detect promoter-proximal Pol II signal, limits the interpretation of bursting kinetics.  
162 The authors mention that highly paused genes exhibit higher burst frequency. How do  
163 the authors reconcile the concept of a burst phase with pause-release? Is bursting  
164 size and bursting frequency related to features of gene regulation that suggest these  
165 bursting properties are modulated at Pol II recruitment or pause-release? The authors  
166 do some analysis of core promoter elements, but do genes and promoters with similar  
167 burst sizes or frequencies share any functional or structural similarities?

168 Our analysis indicated that genes containing motifs associated with promoter-proximal  
169 paused Pol II, as identified by co-PRO-seq(Tome et al., 2018), exhibit increased burst  
170 frequencies across the body of the gene. As previously discussed, the inability of  
171 scGRO-seq to detect promoter-proximal paused Pol II constrains our ability to explore  
172 the concept of a burst phase with pause release, as requested by the reviewer.

173

174 We concur that our current data and interpretations related to paused genes are  
175 incomplete. Therefore, we have excluded the only instance of data and assertions  
176 regarding paused Pol II (**Figure 2g**) as this constitutes a minor component of our study  
177 and does not impact the findings presented in **Figure 2**.

178

179 Regarding the reviewer's additional comment on whether the modulation of bursting  
180 parameters occurs at the stages of Pol II recruitment or pause release, we are  
181 cautious in drawing conclusions due to the above-mentioned limitation of our data  
182 around the promoter-proximal pause regions. In addressing whether genes and  
183 promoters with similar burst sizes or frequencies share any functional or structural  
184 similarities, we have presented the functional similarity using gene set enrichment  
185 analyses in **Figure 2h**. We show that Myc target genes have increased burst size and  
186 Aff4 target genes have higher burst frequency. A previous single-molecule imaging  
187 study(Patange et al., 2022) illustrated that Myc increases burst duration, thus  
188 augmenting burst size. Likewise, Aff4, integral to the super elongation complex (SEC),  
189 is implicated in facilitating the release of paused Pol II, aligning with observations of  
190 higher burst frequency in genes bound by SEC(Byun et al., 2012). The comprehensive  
191 functional enrichment analysis for genes sharing burst size and frequency  
192 characteristics is detailed in **Table 2**.

- 193
- 194 4. The authors' explanation for the superiority of scGRO-seq over scRNA-seq for  
195 classifying cells based on their cell cycle phase is not entirely convincing. Recent  
196 versions of scRNA-seq methods are not dependent on polyadenylation of the  
197 transcript, and they can efficiently capture non-polyadenylated transcripts including  
198 histone genes (VASA-seq by Salmen et al, 2022 and STRS by McKellar et al, 2023).  
199 The authors should consider revising the text and conclusions where appropriate.

200 Additionally, they could perform UMAP analysis to determine if cells can be clustered  
201 into distinct groups based on the cell cycle profile.

202 We are grateful to the reviewer for highlighting the single-cell methodologies that are  
203 independent of polyadenylated transcripts. The cell-cycle results section of the  
204 manuscript has been updated to state the limitation of polyadenylated RNA-based  
205 scRNA-seq methods as opposed to scRNA-seq methods. The revised text also  
206 includes an acknowledgment and reference of the single-cell RNA-seq methods that  
207 are not contingent on polyadenylation (VASA-seq by Salmen et al., 2022 and STRS  
208 by McKellar et al., 2023), as suggested by the reviewer.

209  
210 However, it should be recognized that the methods cited by the reviewer generally  
211 capture all RNA, with ribosomal RNA being depleted in VASA-seq only. The proportion  
212 of intronic and other non-coding RNA isolated by these methods, especially the  
213 enhancer-RNA, is considerably low. Similarly, the presence of a steady-state level of  
214 cell-cycle-specific genes in the cytoplasm, also detected by these methods, could  
215 hinder the precise inference of temporal resolution, which scGRO-seq overcomes by  
216 capturing only actively transcribed nascent RNA.

217  
218 Regarding the reviewer's suggestion to utilize UMAP for data representation, in light  
219 of the limitations of dimensionality reduction (Chari and Pachter, 2023), we prefer our  
220 current approach for determining and displaying cell-cycle stages in the manuscript  
221 as it effectively identifies, quantifies, and communicates the essence of cell-cycle  
222 heterogeneity in our data.

- 223  
224 5. The manuscript's most critical findings are co-transcription of functionally related  
225 genes and temporal coordination between genes and enhancers, which can't be  
226 confidently dissected using existing bulk nascent transcriptomic methods and require  
227 nascent transcription profiling at single cell level, as perfectly employed by the authors.  
228 However, presentations of these findings need to be supported by assessment of  
229 variations between individual cells. Figures 4 and 5, along with associated  
230 supplementary figures, do not adequately highlight these variations. For example, the  
231 authors should indicate what fraction of cells exhibit co-transcription for specific  
232 processes and provide genome browser tracks illustrating co-transcribing genes in  
233 specific individual cells but not in others. The same approach should be applied to  
234 enhancer-promoter pairs in Figure 5.

235 We thank the reviewer for recognizing scGRO-seq's unique ability to analyze the co-  
236 transcription of functionally related genes and the temporal coordination between  
237 enhancers and genes.

238  
239 We regret the oversight in not clearly stating that the supplementary tables provide  
240 the details requested by the reviewer. The proportions of cells exhibiting significant  
241 co-transcription of gene pairs are detailed in the **8<sup>th</sup> column of Table 4**, and genes  
242 implicated in particular processes are listed in **Table 5**. Similarly, the proportions of  
243 cells with enhancer-gene co-transcription are provided in the **6<sup>th</sup> column of Table 6**.  
244 Recognizing the importance of this information as per the reviewer's advice, we have

245 now updated the table legends with further descriptions to clearly communicate the  
246 data structure.

247  
248 In regard to the reviewer's request for "genome browser tracks illustrating co-  
249 transcribing genes in specific individual cells but not in others," we have tried to  
250 interpret this request in **Figure R1.5A**. Co-transcription is difficult to visualize in  
251 conventional genome browsers as it requires visually assigning a read to a cell (see  
252 **Figure 1b**). Instead, we have presented an alternative visual representation for the  
253 co-transcription of genes (**Figure R1.5B**). This graphical approach offers a more  
254 insightful and succinct interpretation compared to traditional genome browser tracks.  
255 Due to a rigorous definition of co-transcription—restricted to a four-minute window by  
256 analyzing only up to 10 kb of the gene regions and excluding the initial 0.5 kb—the  
257 fraction of cells co-transcribing a pair of genes is better suited to display in this  
258 approach, rather than in genome browser.

259

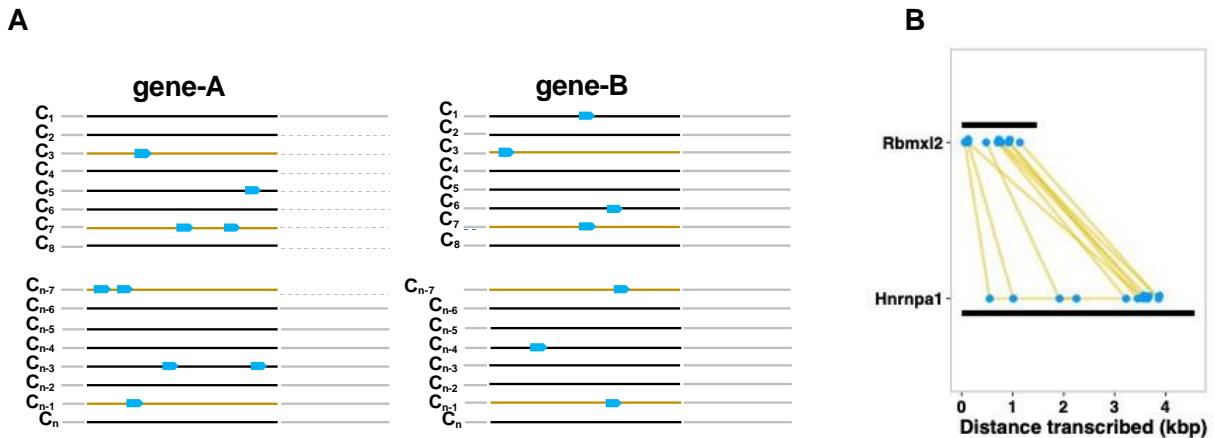

**Figure R1.5. Visualizing co-transcription.**

A. A proposed schematics for visualization of co-transcription based on the reviewer's comments.

B. A co-transcription visualization approach currently implemented in the manuscript.

260 We have included a similar illustrative example in **Figure 4a** of the manuscript, which  
261 depicts co-transcription between the genes *Smarcc1* and *Prkdc*. These plots display  
262 both the number of cells exhibiting co-transcription and, crucially, the specific  
263 positioning of transcribing RNA Pol II on the genes. Co-transcription events are  
264 represented by blue circles connected with yellow lines, while RNA Pol II signals  
265 beyond the 10 kb regions (which are not considered for co-transcriptional analyses)  
266 are denoted by gray circles and lines (**Figure 4a**). The script for these plots is available  
267 in our GitHub repository so that interested readers can visualize the co-transcription  
268 of the genomic regions of their interest.

269

270 Minor Comments:

271 6. Given its single base-pair resolution nature due to the incorporation of a single chain-  
272 terminating O-Propargyl clickable nucleotide during the run-on reaction, we suggest

273 the single-cell assay should be called single-cell click-based PRO-seq (sccPRO-seq).  
274 Also, instead of introducing too many acronyms, we suggest the following alternative  
275 names for the other two assays: for the AGTuC assay consider Click-based PRO-seq  
276 (cPRO-seq or PROclick-seq): and for inAGTuC assay, consider intact nuclei Click-  
277 based PRO-seq (incPRO-seq).

278 We value the reviewer's attentiveness to the precise terminology of our assay. We  
279 acknowledge that PRO-seq was the first description of base pair resolution. However,  
280 GRO-seq is widely understood as the nascent RNA labeling technique, which is an  
281 important attribute of this study as the first single-cell nascent RNA sequencing  
282 method. The name 'scGRO-seq' was chosen for its historical nod to the first nascent  
283 RNA sequencing method and its broader recognition within the scientific community.  
284 The reviewer suggested names could potentially be confused with co-PRO-seq (Tome  
285 et al., 2018). Nevertheless, we are receptive to the reviewer's suggestion. However,  
286 since our previously filed patent identifies the method as scGRO-seq, renaming our  
287 method would necessitate a clear annotation that both scGRO-seq and scPRO-seq  
288 denote the identical procedure.

289  
290 7. While the authors effectively demonstrate the efficiency of cycloaddition using 3'-O-  
291 Propargyl-ATP and its reverse transcription, it remains unclear how efficiently Pol II  
292 incorporates O-Propargyl-NTPs compared to Biotin-NTPs. What fraction of O-  
293 Propargyl RNA is coupled with Azide-DNA via Click-chemistry?

294 We appreciate the reviewer's focus on the comparative efficiency of O-Propargyl-  
295 NTPs versus Biotin-NTPs as substrates for RNA Polymerase II. Although we share  
296 this concern and have sought to address it, developing an unambiguous method to  
297 assess the differential incorporation efficiency is challenging. For instance, performing  
298 run-on experiments with either O-Propargyl-NTPs or Biotin-NTPs followed by  
299 detection using click-chemistry or fluorescently-tagged streptavidin would result in a  
300 composite measurement of run-on efficiency and the labeling method used, rather  
301 than a direct measure of nucleotide incorporation by Pol II only.

302  
303 We considered two potential solutions to this issue:  
304 a. The synthesis of O-Propargyl-NTPs and Biotin-NTPs bearing an additional  
305 identical label, such as a fluorophore, enables consistent detection of nascent RNA  
306 across both modifications. Unfortunately, we could not find a vendor capable of  
307 producing these modified nucleotides.  
308 b. The use of O-Propargyl-NTPs and Biotin-NTPs labeled with radioactive  $^{32}\text{P}$  at the  
309 alpha-phosphate position. However, these nucleotides were similarly unavailable.

310  
311 Given these constraints, an alternative approach would be to evaluate the end-point  
312 nascent RNA detection efficiencies when O-Propargyl-NTPs or Biotin-NTPs are used  
313 during run-on reaction. While this wouldn't directly measure the relative incorporation  
314 efficiencies by Pol II, it would indicate the overall efficiency of nascent RNA detection  
315 with O-Propargyl-NTPs or Biotin-NTPs, which is the ultimate measure of interest.

316  
317 To this end, we prepared an AGTuC library with O-Propargyl-NTPs and a PRO-seq  
318 library with Biotin-NTPs, ensuring consistent conditions, cell type (mouse pancreatic

319  
320  
321  
322  
323  
324  
325  
326  
327

cancer cells), cell number (700,000), processing batch, and handling protocols as shown in **Figure R1.7.1A**. To reduce variability, the PRO-seq protocol was adapted to mirror the AGTuC strategy, specifically in the attachment of a 5' adaptor through template switching oligos. Equal numbers of reads from each library were then analyzed to assess genome coverage at varying sampling rates (**Figure R1.7.1B**). This analysis revealed remarkably similar genome coverage by both methods, suggesting that the overall efficiency of nascent RNA capture and sequencing is on par whether utilizing O-Propargyl-NTPs or Biotin-NTPs.

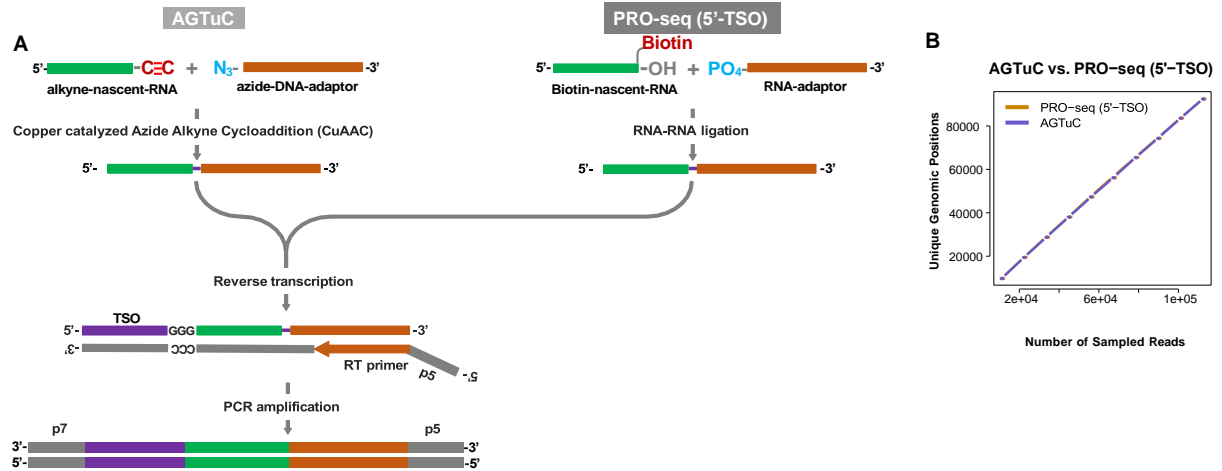

**Figure R1.7.1. Nascent RNA capture efficiency with either O-Propargyl-NTPs or Biotin-NTPs. A,** A schematic of AGTuC and modified PRO-seq experiments to measure nascent RNA capture efficiency. **B,** A comparison between AGTuC and modified PRO-seq in genome coverage per sequenced reads.

328  
329  
330  
331  
332  
333  
334  
335  
336  
337  
338  
339  
340  
341  
342  
343  
344

In response to the reviewer's second inquiry on "What fraction of O-Propargyl RNA is coupled with Azide-DNA via Click-chemistry?", we conducted an assay to quantify the efficiency of coupling O-Propargyl RNA to Azide-DNA via Click-chemistry. The experiment utilized 28-nucleotide RNA labeled with [ $\alpha$ -<sup>32</sup>P]-CTP, synthesized in vitro, and incorporated either UTP-azide or UTP-alkyne. The design of the DNA template ensured that the click-compatible UTP was incorporated exclusively at the RNA's 3' end. This RNA was then subjected to either CuAAC or SPAAC using commercially synthesized 20-nucleotide azide-DNA or BCN-DNA, respectively, with click-compatible modifications present at the DNA's 5' end. The DNA was used in a 100-fold excess to replicate the scGRO-seq condition. The reactions were conducted both with and without PEG 8000, a molecular crowding agent that enhances the kinetics of the reaction. Following incubation, the products were separated by denaturing PAGE, and both the reacted (clicked) and unreacted (unclicked) products were excised and quantified through scintillation counting (**Figure R1.7.2**).

Under the optimized conditions of the CuAAC reaction—100-fold excess azide-DNA and a 2-hour incubation at 50°C in the presence of 15% PEG 8000—the click reaction



345  
 346  
 347  
 348  
 349  
 350  
 351  
 352

efficiency exceeded 95%. These precise conditions are used in our scGRO-seq protocol. This panel can be added to the supplementary data if the reviewer and editor find it helpful.

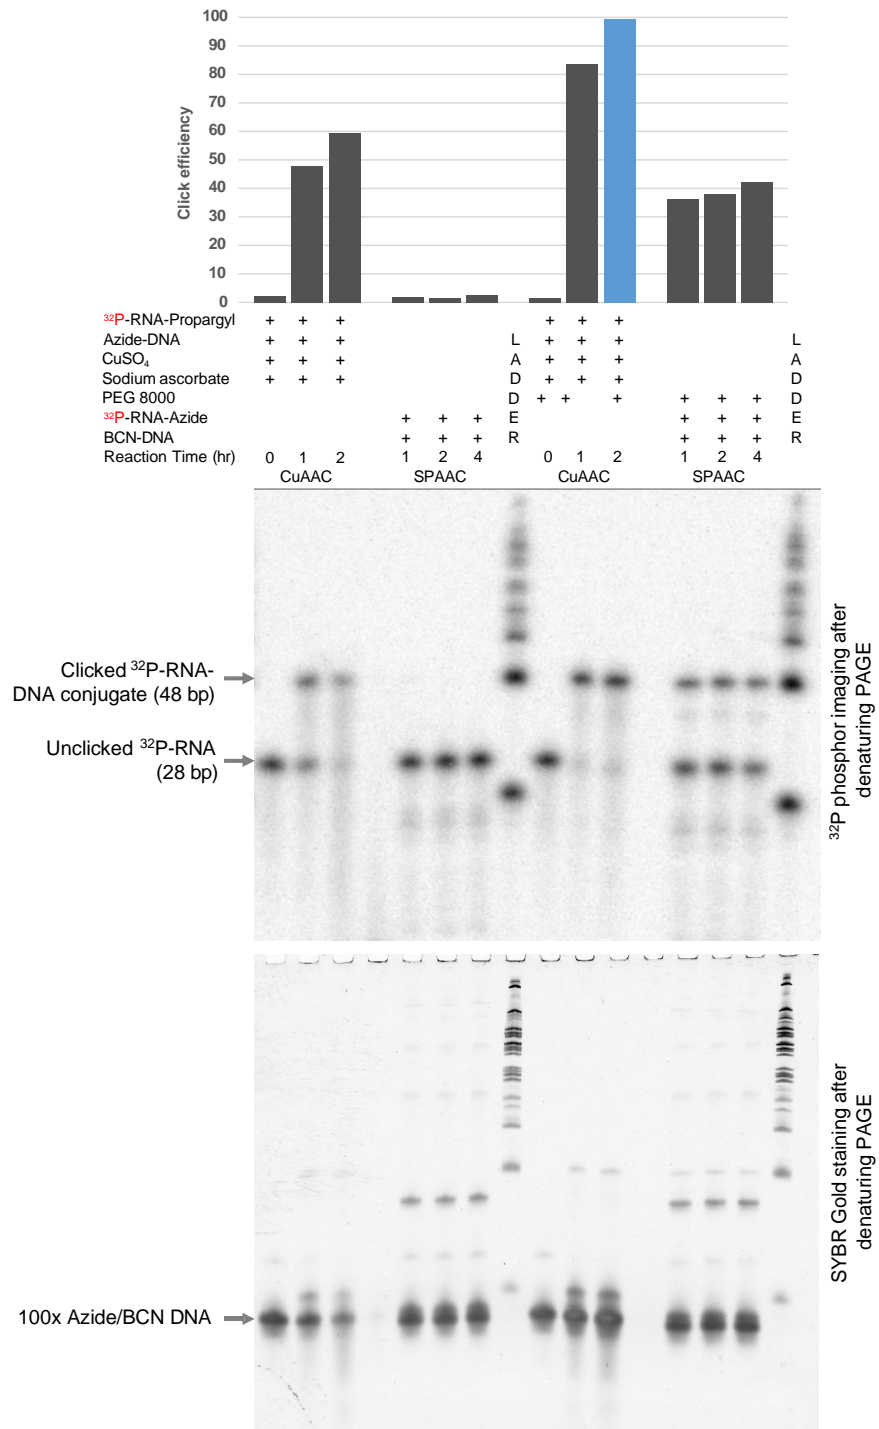

Figure R1.7.2. CuAAC and SPAAC quantification.

353 **Referee #2 (Remarks to the Author):**

354 The manuscript from Mahat et al. describes the development of a bioorthogonal approach  
355 to bar tag immature RNA molecules for amplification and single cell sequencing. The  
356 impact of this approach is the ability to detect immature RNAs, which are typically hard to  
357 amplify given the lack of a functional handle like the poly-A tail of mature RNAs. The  
358 chemistry is an extension of “Click Code Seq,” which was developed for looking at sites  
359 of base excision repair (J. Am. Chem. Soc. 140 (31): 9783–9787). Assuming that the click  
360 chemistry and RT-PCR read through of the resulting triazole are both consistent for  
361 different RNAs (see comment below), this tool is a powerful method for performing  
362 experiments that were quite difficult to do in the past, several of which they explore  
363 including co-transcription of genes and enhancers, histone transcription, etc. I believe that  
364 this method could be very useful and would support publication after the authors respond  
365 to my comments.

366 We acknowledge the reviewer’s constructive comments on our manuscript and their  
367 acknowledgment of the potential utility of our biorthogonal approach for tagging nascent  
368 RNA molecules. We concur with the reviewer’s assessment regarding the need to  
369 demonstrate comparable click chemistry and RT-PCR read-through efficiency across  
370 different nucleotides. We have conducted experiments to confirm the robustness of our  
371 method (see **Figure R1.7.2**), and also ensured that the different propargyl-NTPs do not  
372 introduce biases in click-chemistry or RT (see **Figure R2.2**), as requested by the  
373 reviewer.

374  
375 1. The authors don’t appear to have referenced the Click Code Seq paper mentioned  
376 above. I may have missed it, but if I didn’t they should mention this technique and  
377 reference the paper.

378 We are grateful to the reviewer for bringing our attention to the omission of the Click  
379 Code Seq paper citation. The paper is now appropriately cited in the revised version  
380 of our manuscript.

381  
382 2. The CuAAC and RT-PCR steps do not go to 100%. Therefore, the reliability of the data  
383 should be dependent on the efficiency of these steps being the same across  
384 experiments and at each propargyl-dNTP. However, it appears that the authors only  
385 tested these step with propargyl-dATP on the RNA (Extended Data Figure 1). While I  
386 agree that the CuAAC is not likely to be dependent on the nature of the base, the  
387 same might not be true for RT-PCR. I suggest that the authors use their best  
388 conditions and confirm that the nature of the propargyl-dNTP does not alter the  
389 efficiency of either of these two steps.

390 We thank the reviewer for raising the concern of propargyl-nucleotide bias in CuAAC  
391 and RT-PCR. The overall efficiency of CuAAC for our experimental conditions is  
392 extremely high (**Figure R1.7.2**). Nevertheless, as suggested by the reviewer, we used  
393 our best conditions to test the potential bias introduced by different propargyl-  
394 nucleotides during CuAAC and RT.

395  
396 Ideally, we would perform this experiment with four species of RNA, each with a  
397 different terminal propargyl-nucleotide. However, the only vendor that synthesizes  
398 RNA with terminal propargyl-nucleotide offers propargyl-ATP only as the terminal

399  
400  
401  
402  
403  
404  
405  
406

nucleotide, hence the use of propargyl-ATP in **Extended Data Figure 1**. To overcome this limitation, we labeled nascent RNA in four aliquots of 2.5 million nuclei with either propargyl-ATP, propargyl-CTP, propargyl-GTP, or propargyl-UTP. By using only one propargyl-NTP at a time, with the remaining three native NTPs, we ensure that all nascent RNA is terminally labeled with the corresponding propargyl-NTP. We removed the unused NTPs, clicked Cy5-azide to the propargyl-labeled nascent RNA, and then quantified Cy5 fluorescence. We performed these experiments in replicates to assess experimental variation.

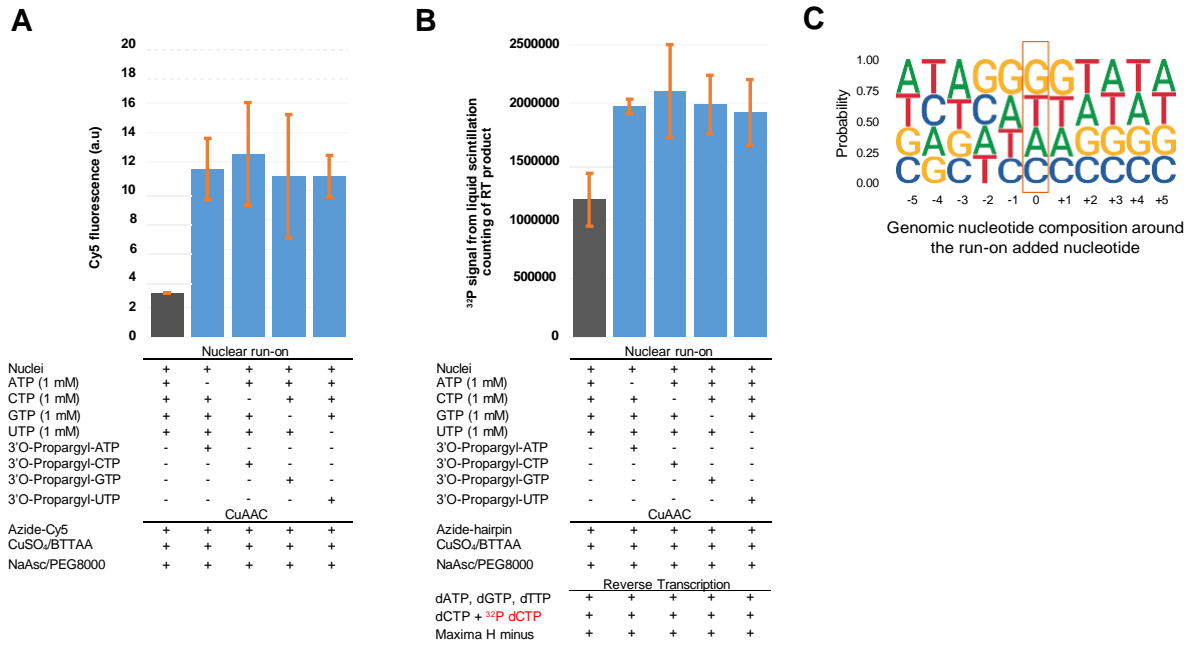

**Figure R2.2. Assessment of CuAAC and Reverse Transcription bias by propargyl-NTPs.** **A**, Bias in CuAAC efficiency as a function of different propargyl-NTPs measured by clicking and quantifying the individually-labelled nascent RNA with azide-Cy5. **B**, Bias in reverse transcription efficiency as a function of different propargyl-NTPs measured by scintillation counting. Propargyl-labeled nascent RNA was clicked with azide-DNA and reverse transcribed in presence of <sup>32</sup>P-CTP. **C**, The genomic composition of nucleotides centered at the run-on added nucleotide.

407  
408  
409  
410  
411  
412  
413  
414  
415  
416

We found that the experimental variation is larger than the difference in CuAAC efficiency with different propargyl-nucleotides (**Figure R2.2A**).

Similarly, to measure the potential bias in reverse transcription due to different propargyl-nucleotide, we labeled nascent RNA with different propargyl-NTP as described above but clicked with hairpin azide-DNA instead of azide-Cy5 and reverse transcribed in the presence of <sup>32</sup>P-CTP. Similar to the CuAAC bias experiment, we found that the experimental variation is greater than the variation in RT as a function of the propargyl nucleotide (**Figure 2.2B**).

417 Because these experiments fell short of confirming or denying the potential bias  
418 introduced by different propargyl-NTP during CuAAC and RT, we examined the  
419 composition of the nucleotide added in the run-on reaction in scGRO-seq and its  
420 surroundings. If CuAAC and RT have a bias towards a specific propargyl-NTP, it  
421 would be detected in this analysis (at the position “0”). We did not observe a significant  
422 difference in the frequency of run-on added nucleotide or its surroundings, suggesting  
423 either the absence or undetectable levels of nucleotide bias in CuAAC and RT (**Figure**  
424 **2.2C**).  
425  
426

427 **Referee #3 (Remarks to the Author):**

428 Mahat et al present scGRO-seq, an exciting new technique to study nascent transcription  
429 in single cells. Similar to GRO-seq or Pro-seq, this technique resolves the positions of  
430 individual transcriptionally engaged polymerases with base-pair resolution, but it is the  
431 first approach to provide also single cell resolution. This clearly is a methodological  
432 breakthrough and of major interest to many fields of research. However, some of the  
433 computational analyses must be developed further and better explanations are  
434 necessary. As presented, I am not yet fully convinced that the data quality is sufficiently  
435 high to provide quantitative estimates of transcriptional bursting and to “investigate the  
436 mechanisms of transcription regulation and the role of enhancers in gene expression” as  
437 claimed in the abstract.

438 We express our sincere gratitude to the reviewer for their endorsement of the broad scope  
439 and novelty of scGRO-seq. We concur with the reviewer's constructive suggestion to  
440 enhance the computational analyses and the clarity of explanations in our manuscript. In  
441 response to the reviewer's constructive feedback, we have re-evaluated our  
442 computational strategies, improved data analyses, and provided more detailed  
443 methodological expositions, as detailed below.

444

445 Major concerns:

446 1. The capture efficiency is not only per se an interesting parameter of scGRO-seq, the  
447 estimate (10%) obtained here is also critical to the analyses regarding “evidence of  
448 bursting de novo without prior assumptions” and the estimation of burst sizes and  
449 frequencies. The authors describe two ways to derive the capture efficiency. The first  
450 way is based on the comparison to intron seqFISH shown in Fig. 1f. Here, I have two  
451 concerns:

452

453 a. The capture efficiency of 10% is taken to be the probability of \*any Pol2\* that  
454 currently transcribes a gene to be detected by scGRO-seq. This would only be  
455 valid if only scGRO-seq reads were considered corresponding to Pol2 that  
456 transcribed the intron during that time the intron is not yet degraded. I give an  
457 example: For the sake of the argument let's say the capture efficiency of intron  
458 seqFISH is 100%, we have a 100kb gene, and the intron is immediately degraded  
459 after co-transcriptional splicing within 1 min after splicing. Further, let's say we  
460 have on average 1 intron per cell detected, and 0.23 scGRO-seq reads per cell (in  
461 the whole gene body) on average. In this simplified example, we thus have, on  
462 average, \*one\* Pol2 in the region 2.5kb after the FISH probes of the gene (this  
463 also depends on where in the intron the probes are). This means that we have 40  
464 Pol2 currently transcribing the gene (in the whole gene body) per cell on average.  
465 The probability to detect a Pol2 is not 23%, it is 0.006%. In summary, this estimate  
466 of capture efficiency depends on the intron splicing kinetics and the length of the  
467 gene. If splicing is indeed co-transcriptional, the capture efficiency being the above  
468 mentioned probability is overestimated.

469 The reviewer raises an important technical concern on scGROseq's estimated  
470 capture efficiency, which is derived from a comparison with intron seqFISH data.

471 The reviewer is correct to point out that the estimated capture efficiency of 10%  
472 “would only be valid if only scGRO-seq reads were considered corresponding to

473 Pol2 that transcribed the intron during that time the intron is not yet degraded”. We  
 474 want to emphasize that we are only considering Pol IIs in scGRO-seq that  
 475 correspond to a similar time window of intron detection before degradation in intron  
 476 seqFISH data. The reviewer correctly states that the “estimate of capture efficiency  
 477 depends on the intron splicing kinetics and the length of the gene” but did not factor  
 478 them in their simplified example. Intron seqFISH probes targeted the first introns,  
 479 whose median length is 7.6 kb (**Figure R3.1A**). At a transcription rate of 2.5 kb/min,  
 480 it takes ~ 3 min to transcribe the introns used in intron seqFISH. More importantly,  
 481 the median time required for intron to be spliced out once it is transcribed ranges  
 482 from 5 to 10 minutes, as reported in several studies using diverse  
 483 methods (Audibert et al., 2002; CLEMENT et al., 1999; Coulon et al., 2014;  
 484 Neugebauer, 2019; Rabani et al., 2014, 2011; Singh and Padgett, 2009). Even if  
 485 we conservatively assume that the fluorescent probes detect the introns only after  
 486 the intron transcription is complete and the introns are immediately degraded after  
 487 splicing, the introns  
 488 are detectable during the splicing time of at  
 489 least 5 to 10 minutes.  
 490 Considering the  
 491 average splicing time  
 492 of 8 minutes (from the  
 493 above-mentioned  
 494 studies and personal  
 495 communication with  
 496 Daniel Larson from  
 497 NCI, who studies  
 498 splicing kinetics in live  
 499 cells using advanced  
 500 imaging modalities)  
 501 corresponds to the  
 502 transcription time of  
 503 20 kb at 2.5 kb/min.

504 To maintain a similar  
 505 detection time window  
 506 between the two  
 507 methods, we have  
 508 used Pol II from up to  
 509 20 kb from the TSS for  
 510 the correlation  
 511 analysis between  
 512 scGRO-seq and intron  
 513 seqFISH. We again  
 514 observe a slope of  
 515 0.26 (**Figure R3.1B**).  
 516 The intron seqFISH

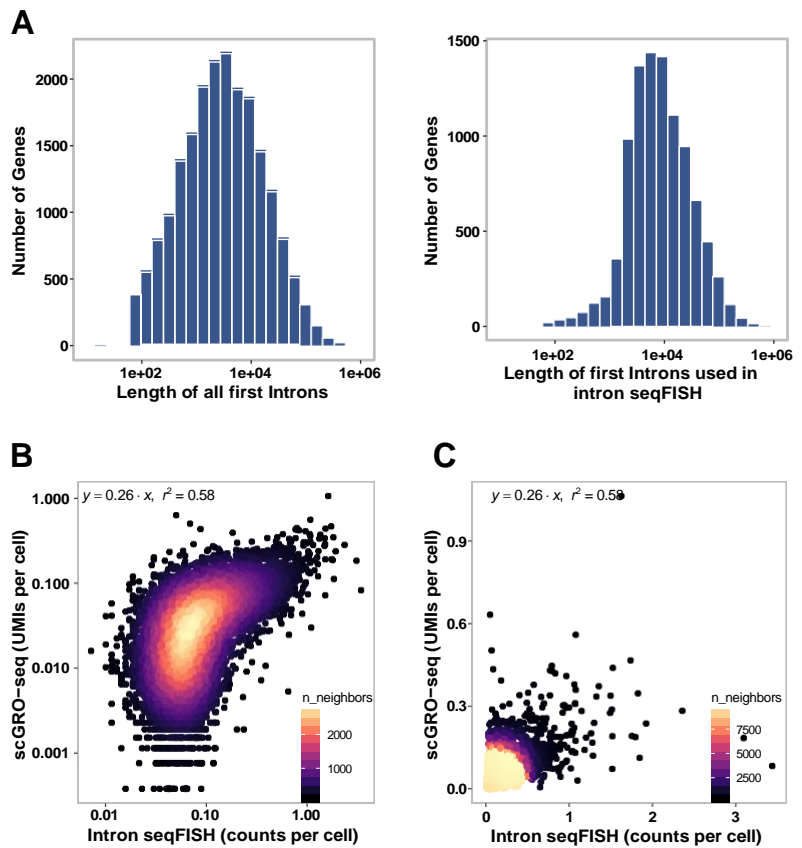

**Figure R3.1. Correlation between scGRO-seq and intron seqFISH.** **A**, Length of first introns of all genes (left panel) and genes used in intron seqFISH (right panel). **B**, Correlation between scGRO-seq UMIs per cell and intron seqFISH counts per cell shown in log scale. **C**, Correlation between scGRO-seq UMIs per cell and intron seqFISH counts per cell shown in linear scale.

519 estimates its capture efficiency at 44% based on a comparison of a handful of  
520 genes using single-molecule FISH. Using these numbers, we arrive at a similar  
521 estimate of capture efficiency of 11% ( $0.23 \text{ of } 0.44 = 0.11$ ).  
522

- 523 b. The 23% are apparently taken from the linear regression shown in Fig. 1f. I think I  
524 understand the basic idea ( $y=0.23x$ , if  $y$  is scGRO-seq reads and  $x$  is detected  
525 introns per cell). I do not understand why an intercept term was fitted and how to  
526 interpret it. Even more importantly: The fit was apparently done on the log-log plot,  
527 i.e.  $\log(y)=0.23 \log(x)$ , which means  $y=x^{0.23}$ . Why this is related to the capture  
528 efficiency is not clear to me.

529 We thank the reviewer for bringing our attention to the unwarranted use of intercept  
530 in our equation. We concur that it is more appropriate to fit for  $y = mx$ . We have  
531 replotted all of our correlation analyses for  $y = mx$ , dropping the intercept term. We  
532 see improved correlation across the board. For example,  $r^2$  between scGRO-seq  
533 and intron seqFISH increased from 0.32 to 0.58.  
534

535 However, we apologize for the reviewer's confusion about the plot. The fit is not  
536 calculated from log-log data. The fit is calculated from the data on a linear scale,  
537 and the data points are plotted on the log-log scale for visualization purposes only.  
538 As shown in **Figure R3.1C**, the linear scale correlation plot fails to display the  
539 range of data, which is clearly shown if the data points are plotted in the log scale.  
540

- 541 2. The second way to estimate capture efficiency is based on a measurement of the  
542 number of engaged Pol2 in HeLa cells from 1996 and makes several risky  
543 assumptions (20% of Pol2 is in paused state - Reference missing; the number of active  
544 Pol2 is proportional to the genome size - why should this be the case; HeLa cells are  
545 2.2 times more transcriptionally active than mESCs - this is based on a computational  
546 comparison of tumor vs normal RNA-seq samples with the mean factor being 2.2, but  
547 depending on the samples studied, with varying factors of 0.5 to 8; this did not include  
548 a comparison of cancer-derived cell lines such as HeLa, nor embryonic stem cells,  
549 which might indeed be more active than somatic tissue cells). Thus, how accurate the  
550 10% capture efficiency actually is, is not clear. This is important for its usage in the  
551 analyses done in the manuscript.

552 The second way to estimate capture efficiency by using the number of Pol II molecules  
553 in mammalian cells was intended to provide a complementary approach that is  
554 independent of intron seqFISH. There are not many studies that measure actively  
555 transcribing RNA polymerases in a cell, unlike mRNA measurements. We used the  
556 biochemical studies that quantified the number of actively transcribing RNA  
557 polymerases per cell, which is still one of the most quantitative and direct  
558 measurements of RNA Pol II molecules. Unfortunately, this was done in Hela cells.  
559 We made assumptions to the best of our knowledge in order to make the comparison  
560 fair. The claim that 20% of Pol II is present in a paused state is calculated from PRO-  
561 seq data by us in this study and, hence, no reference. We show that scGRO-seq  
562 misses paused Pol II (**Extended Data Figure 4a & Figure R1.1.2**), and a simple  
563 analysis of PRO-seq and AGTuC data indicates that ~20% of Pol II are in a paused  
564 state.

565  
566 However, we do agree that other assumptions in this calculation are difficult to confirm,  
567 but neither should they be simply overlooked. We could not ignore the genome size  
568 between mice and humans despite the similar number of genes, as transcription is  
569 widespread beyond genes. Similarly, the transcription level in HeLa cells with abnormal  
570 karyotypes (Landry et al., 2013; Macville et al., 1999) can be generally assumed to be  
571 higher than in karyotypically normal cells, although the precise level may not be clear.  
572 In the absence of a precise quantification between HeLa and mES cells, we used a  
573 mean factor of 2.2-fold from a study comparing RNA levels between tumor and normal  
574 cells. Nevertheless, we understand the concerns raised by the reviewer.

575  
576 We, therefore, have entirely removed this second approach of estimating capture  
577 efficiency from the manuscript.

578  
579 A more important clarification, however, is that we do not think the accuracy of 10%  
580 capture efficiency is critical for the analyses done in the manuscript. The capture  
581 efficiency is simply a scaling factor used only to estimate the absolute burst kinetics.  
582 Even there, we show that the absolute burst kinetics derived from scGRO-seq  
583 correlates well with intron seqFISH (**Figure 4c**), whereas similar comparisons with  
584 scRNA-seq-derived burst kinetics show worse correlation for both intron seqFISH and  
585 scGRO-seq (**Extended Data Figure 8c**). The evidence of bursting (**Figures 2b & 2c**)  
586 is unaffected by capture efficiency because the evidence is derived by comparing  
587 against the permuted data (see the response to the reviewer's comment #4 as well).  
588 Similarly, the role of promoter elements in burst kinetics (**Figures 2g & 2h**) is  
589 independent of capture efficiency because the measurements are relative differences  
590 among genes. Overall, the capture efficiency we estimated is based on the only  
591 available single-cell intronic RNA imaging study, and, more importantly, the estimated  
592 capture efficiency does not affect most biological interpretations in this study.

593  
594 3. The authors use their data to assess "evidence of bursting de novo without prior  
595 assumptions" by analysing the number of "multiplets" (genes with more than one read  
596 in a cell). The actually observed multiplets are compared to the ones observed after a  
597 simple permutation approach (for each read, maintain the gene, but assign a random  
598 cell). The permutations do not respect that cells are from different batches with quite  
599 different average read depths. After the permutation approach, all cells will have  
600 around the same number of reads. If multiplets predominantly occur in cells with many  
601 reads (which seems likely to me), doing the permutation globally would reduce the  
602 occurrence of multiplets. The authors should adapt their permutation approach such  
603 that the total read number is maintained for each cell (and it is not sufficient to perform  
604 the same permutation within batches, since also within a batch the read numbers are  
605 quite heterogeneous).

606 We thank the reviewer for emphasizing this important aspect of the permutation. We  
607 confirm that the number of reads per cell is maintained by shuffling cell identifiers  
608 across reads. We do not pool reads from all cells and equally divide among the cells  
609 during permutation. For example, if cell A has 5 reads and cell B has 3, we might  
610 permute AAAAABBB to BABAABAA but not AABABBAB. We also explicitly ensure



611 that the read distribution per cell is preserved after permutation. We apologize if the  
612 text in the methods section failed to clearly communicate this important aspect of  
613 permutation. We have modified the text where applicable to unambiguously state that  
614 the reads per cell are maintained in all permutations.  
615

- 616 4. From the permutation approach (see 3.), the authors conclude that the occurrence of  
617 multiplets is 2.4% higher than expected by chance. From the 10% capture efficiency  
618 estimate, the authors conclude that "the probability of detecting two consecutive RNA  
619 polymerases on a gene is 1%". This 1% is then compared to the 2.4%. I need more  
620 explanations as to why this comparison is relevant (a probability vs. a relative increase  
621 over expectation; two consecutive Pol2 vs. more than 1 observed from potentially  
622 much more Pol2).

623 We apologize for the confusion about these numbers and thank the reviewer for  
624 correctly identifying this confusion in our writing. The 1% number is an illustrative  
625 example of a uniformly random null model assuming 10% capture efficiency, but it is  
626 not used for comparison, as it does not consider the many complexities of real single-  
627 cell data. We include the 1% multiplet statement to help readers understand the  
628 impact of capture efficiency on the number of detected bursts. The only statistical  
629 comparison on which we base our conclusions is the permuted null model, where  
630 reads per cell are maintained. We have improved the description of **Figure 2b** in the  
631 main manuscript to clearly state the use of the permutation null model to provide  
632 evidence of bursting and not the hypothetical probability of 1% for multiplets detection.  
633

- 634 5. scGRO-seq was used to estimate bursting parameters.

635 a. The simulation that is used to validate the estimates seems unrealistic: Once the  
636 number of bursts are simulated, they are "scaled" by the burst size, i.e. always the  
637 mean burst size is taken per burst, instead of drawing it randomly from an  
638 appropriate distribution. The variance of data simulated by this will therefore be  
639 much smaller than in reality.

640 We thank the reviewer for their suggestion to draw the burst size randomly from  
641 an appropriate distribution. We have re-run the simulation using a normal  
642 distribution for burst size at various capture efficiencies, as requested by the  
643 reviewer (**Figure R3.5.1**), and updated the **Extended Data Figure 8b** with the new  
644 plots.  
645

646 b. Even according to these simulations, the estimators used are strongly biased (Ext  
647 Fig 8b, linear regression  $y=0.96+0.64x$ ,  $y$  being the estimated burst size,  $x$  being  
648 the simulated burst size; for an unbiased estimator,  $y=x$ ).

649 We apologize for this oversight and have updated the correlations to remove the  
650  $y$ -intercept term (as suggested by the reviewer in comment #1b). We have also  
651 included the performance of these estimators at various sampling efficiencies,  
652 including 100% (**Figure R3.5.1**). Our simple estimator explains most of the  
653 variance across a range of sampling efficiencies. The reviewer is correct to note  
654 that our estimators were biased by underestimating burst size, which was more  
655 pronounced at low capture efficiencies, likely due to dropouts. However, the

656  
657  
658

updated correlation analyses without the y-intercept term significantly correct the perceived bias in the estimator ( $r^2 \geq 0.9$  at capture efficiency  $\geq 10\%$ ).

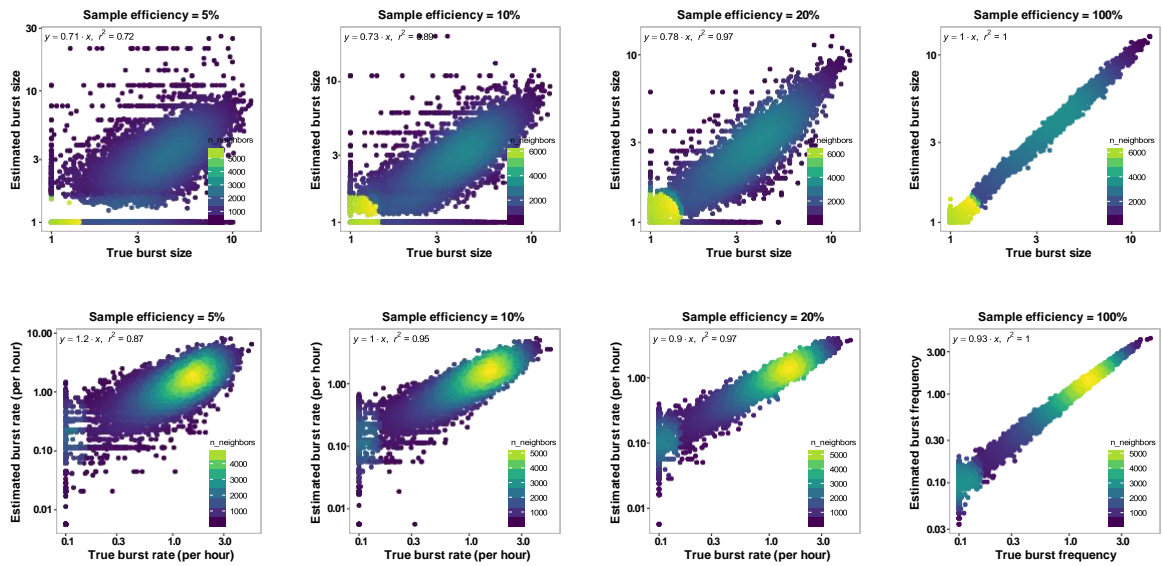

**Figure R3.5.1. Performance of the burst kinetics estimators by simulating burst size and burst frequency at various capture efficiency.**

659  
660  
661  
662  
663  
664  
665  
666  
667  
668

- c. Why are the results in Ext Fig. 8b and d so different? I appreciate that the true parameters (x axis) in d are obtained from the estimates from the data (instead of a normal distributions as in b), but why are the corresponding estimates qualitatively that different?

As noted above, our simulation does not capture complexities such as differences in cell number and batch effects. Nevertheless, the estimator's performance is robust across both datasets (**Figures R3.5.1 & R3.5.2**) ( $r^2 \geq 0.9$  at 10% capture efficiency). The reviewer's suggestion to drop the y-intercept has improved the estimator's performance across the board—we thank the reviewer for their insight.

669  
670  
671  
672  
673  
674  
675  
676  
677  
678  
679

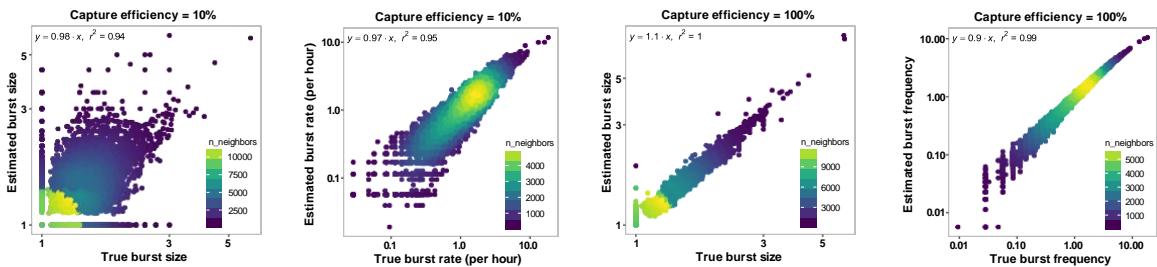

**Figure R3.5.2. Performance of the burst kinetics estimator by simulating read counts using burst size and frequency inferred from observed scGRO-seq dataset.**

680 6. scGRO-seq was used to assess "whether these genes are transcriptionally  
 681 synchronized" (as opposed to "co-expression" of "accumulated mRNA"). I am not  
 682 convinced that the data and in particular the analyses done (focus on 10kb at the start  
 683 of the gene body) allow conclusions about "transcriptional coordination between any  
 684 gene pair or network of genes":

685  
 686 a. Analyses are done on binarized matrices. While Pearson correlation can be used  
 687 with binary variables, the t test computed by cor.test in R assumes normally  
 688 distributed variables and should not be used (there are alternatives, such as chi-  
 689 square statistics).

690 We thank the reviewer for bringing our  
 691 attention to the use of t-test in the  
 692 Pearson correlation analysis. We have  
 693 changed the statistical test to chi-square.  
 694 The chi-square p-value for gene-gene  
 695 pairs is similar to the p-values previously  
 696 calculated using a t-test (Figure R3.6.1).  
 697 R scripts in GitHub for gene-gene and  
 698 enhancer-gene are updated to reflect the  
 699 use of the chi-square test to calculate the  
 700 p-value, which is then corrected for  
 701 multiple hypothesis tests.

702  
 703 b. According to the text, an "empirical false-  
 704 discovery rate" is also used to filter. The  
 705 permutation approach to estimate this  
 706 suffers from the same flaw as mentioned  
 707 above (see concern 3). Here the authors  
 708 say "The permutation method accounts  
 709 for several unknown and known biases,  
 710 such as read depth per cell." If just "cell  
 711 IDs" are shuffled, how is this accounted  
 712 for? The authors should adapt their  
 713 permutation approach such that the total read number is maintained.

714 As explained in our response to the reviewer's comment #3, the reads per cell are  
 715 maintained in permutations. We apologize for the confusion created by failing to  
 716 clearly state that the reads per cell are not equally divided among the cells and  
 717 are, in fact, maintained in each permutation. To further clarify our permutation  
 718 approach, we have outlined a simplified example below:

| Seqnames | ranges          | strand | cell-ID | permuted cell-ID |
|----------|-----------------|--------|---------|------------------|
| chr1     | 4808020-4808069 | +      | c01     | c02              |
| chr1     | 4808144-4808171 | +      | c02     | c03              |
| chr1     | 4808183-4808243 | +      | c03     | c01              |
| chr1     | 4808217-4808271 | +      | c03     | c02              |
| chr1     | 4808223-4808280 | +      | c01     | c03              |
| chr1     | 4808344-4808377 | +      | c02     | c03              |
| chr1     | 4808383-4808343 | +      | c03     | c01              |

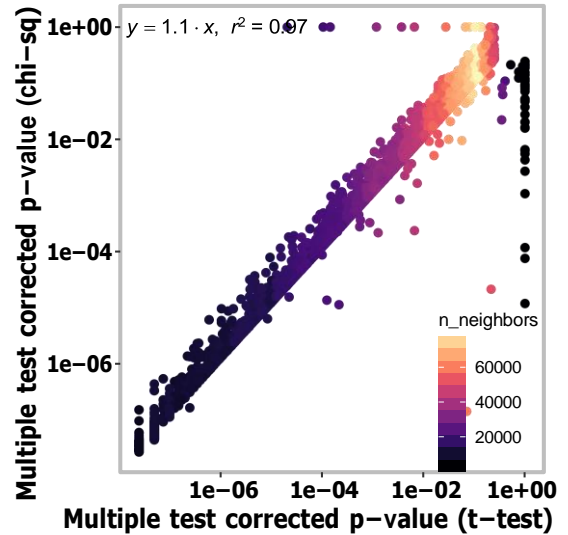

Figure R3.6.1. Correlation between multiple hypothesis corrected p-values for gene-gene co-transcription using t-test and chi-square test. Only values less than 0.25 in either test are plotted for clarity.

|     |      |                 |   |     |     |
|-----|------|-----------------|---|-----|-----|
| 728 | chr1 | 4808417-4808472 | + | c03 | c03 |
| 729 | chr1 | 4808423-4808484 | + | c01 | c03 |
| 730 | chr1 | 4808544-4808579 | + | c02 | c01 |
| 731 | chr1 | 4808583-4808543 | + | c03 | c01 |
| 732 | chr1 | 4808617-4808676 | + | c03 | c03 |
| 733 | chr1 | 4808623-4808685 | + | c01 | c02 |

Cell-ID tally: **c01=4, c02=3, c03=6**  
 Permuted Cell-ID tally: **c01=4, c02=3, c03=6**

- c. The empirical p value is derived from 1000 permutations. This is not corrected for multiple testing (and much more permutations would be necessary to apply Benjamini-Hochberg or similar).

The reviewer rightly pointed out that the multiple hypothesis testing of the empirical p-value derived from 1000 permutations would require a significantly higher number of permutations than 1000. The number of hypotheses tested is 15,021 x 15021 for Gene x Gene co-transcription and would require, for example, more than 200 million permutations for Bonferroni correction. Our ability to perform more permutations was limited by computation time (1000 permutations and empirical p-value calculation takes a day using 16 core CPUs in a shared cluster). More importantly, the permuted data would begin to repeat the pattern after a certain number of permutations due to the sparsity of data. We show that the empirical p-value has a good agreement even between 200, 1000, and 2000 permutations (**Figure 3.6.2**), indicating a diminishing improvement in the accuracy of the empirical p-value with additional permutations.

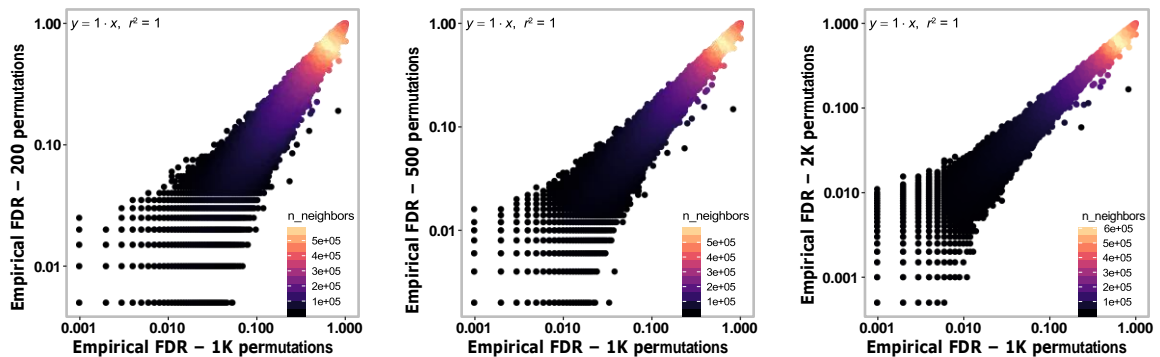

**Figure R3.6.2. Correlation of empirical false discovery rates at different number of permutations as indicated.**

The lack of multiple hypothesis correction of the empirical p-value derived from permutation tests is precisely the reason we opted for a parallel approach of Pearson correlation, which is used by single-cell papers to measure co-expression. The p-value (now derived using the chi-square test after the reviewer's recommendation) is corrected for multiple hypothesis testing using the Benjamini-Hochberg (BH) correction method. For a Gene-Gene pair to be considered significantly co-transcribed, we require the pairs to pass a threshold in each approach: pairwise correlation  $\geq 0.1$  and multiple-hypothesis corrected p-value

762  
763  
764  
765  
766  
767

from chi-square statistics  $< 0.05$  from the correlation approach, and empirical FDR  $< 0.05$  from the permutation approach. We find that the statistically significant co-transcribed gene-gene pairs from the overlap between BH corrected chi-square p-value and the empirical FDR from various numbers of permutations (Figure 3.6.3) remain relatively consistent, highlighting the robustness of the dual approach.

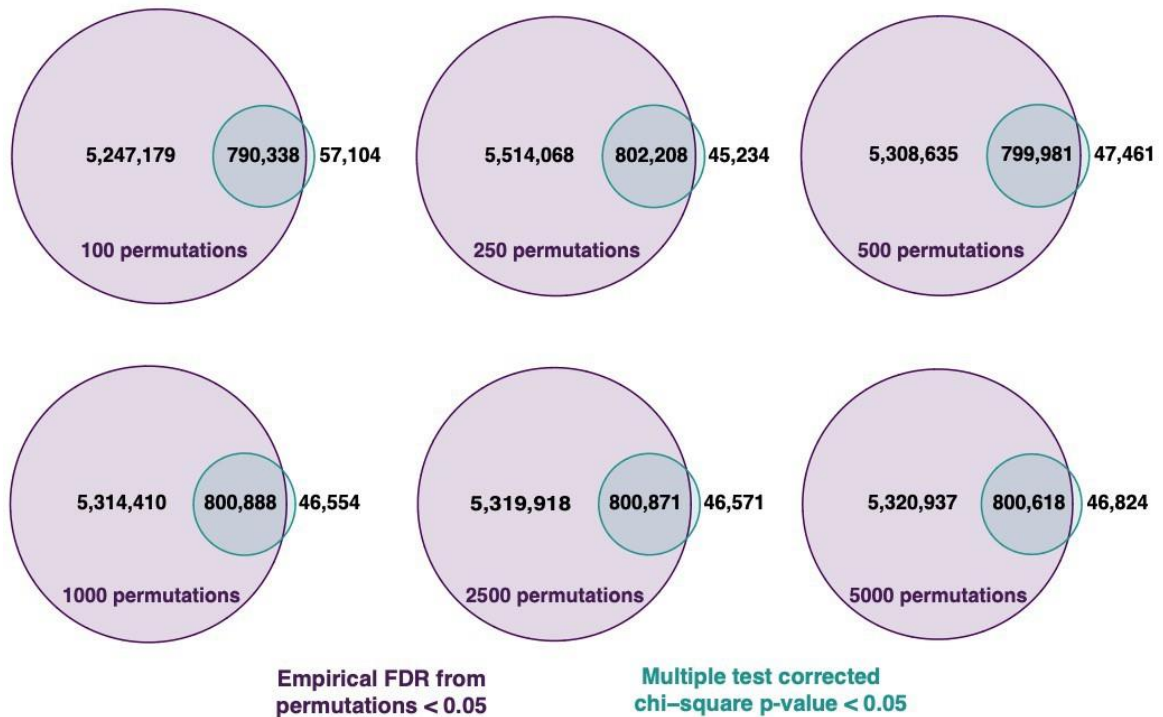

**Figure R3.6.3. Overlap between co-transcribed gene-gene pairs that pass thresholds of multiple hypotheses corrected p-values from chi-square test ( $< 0.05$ ) and empirical false discovery rate of 0.05 in different numbers of permutations.**

768  
769  
770  
771  
772  
773  
774  
775  
776  
777  
778  
779  
780

- d. In the end the argument is based on testing for association of two binary variables. Even if the authors had accounted for confounding factors, if there is a subset of the cells where the gene is expressed, and not expressed in the others (e.g. as it is expected for cell cycle genes), association would not necessarily mean "transcriptional coordination": Take any pair of genes (not correlated at all), and add more and more cells where both genes are 0. At some point there will be a highly significant association. Clearly this does not mean that their expression is synchronized in single cells, just that they are co-expressed in the same subset of the cells. It is therefore not surprising that circadian and cell cycle related genes come out of that analysis. Thus, as presented, scGRO-seq data do not bring benefits over data of "accumulated RNA".

The permutation approach controls for the zero-inflated nature of the data noted by the reviewer. In any large-scale dataset such as this, it is difficult to completely

781 rule out false positives. Nevertheless, we attempt to minimize the false positives in  
782 determining co-transcription by implementing two independent approaches as  
783 described above in our response to the reviewer's concerns. To examine the  
784 strength of scGRO-seq's co-transcriptional analysis, we compared it with gene-  
785 gene co-transcription in intron seqFISH data and found a good agreement ( $r^2 =$   
786 0.59, **Figure 4c**).

787  
788 It is important to note that co-transcription measured by nascent RNA is  
789 substantially different than co-expression measured by steady-state mRNA levels  
790 due to the vastly different timescales involved (4-minute detection window for a 10  
791 kb transcription region in scGRO-seq vs several hours of detection window for  
792 accumulated mRNA). We acknowledge the reviewer's concern about the use of  
793 the term "synchronized" and apologize if the reviewer's confusion by the term  
794 "synchrony" or "synchronized" stems from the lack of evidence of order in gene-  
795 gene co-transcription or physical contact between the genes. We concur that we  
796 have not inferred the order of transcription in co-transcribed gene pairs, and the  
797 current data neither captures nor insinuates a physical contact between the pair.  
798 We tried to explicitly state that we are measuring co-transcription, as opposed to  
799 co-expression in scRNA-seq. We think that if two genes are transcribed within four  
800 minutes of each other when an average gene is transcriptionally ON for 7 minutes  
801 (median length of mouse transcription until is 17.5 kb) and remains OFF for 2 hours  
802 (**Figure 2e**), and each phase of cell cycle lasts hours, they are coordinately  
803 transcribed, and likely represents a shared biological function as shown in **Figure**  
804 **4b**. We have replaced the terms "synchrony" or "synchronized" in the manuscript  
805 to avoid the confusion that the reviewer indicated.

- 806  
807 7. All these concerns also apply to the association of gene-enhancer pairs that were  
808 analyzed using the same methodology.

809 We have addressed the reviewer's concerns about gene-gene co-transcription and  
810 applied the relevant suggestions and modifications to the enhancer-gene pairs as well.  
811 For example, the t-test in correlation analysis of enhancer-gene co-transcription is  
812 replaced with a chi-square test. We also confirm that the reads per cell are maintained  
813 during permutations in enhancer-gene analyses. We hope the novelty of the  
814 enhancer-gene coordination analyses at the single-cell level helps readers appreciate  
815 the utility of scGRO-seq and apply it to understand the mechanisms of transcription  
816 regulation.

- 817  
818 8. \*Four\* super enhancers have correlations in the first few 5kb bins with the first few  
819 5kb bins of their genes that might suggest that transcription at enhancers precedes  
820 transcription of the gene. The result section rightfully is careful about this: "However,  
821 any conclusions will require a much deeper data set." However, the abstract says that  
822 this "indicates that the bursting of transcription at super-enhancers precedes the burst  
823 from associated genes", and the end of the introduction mentions "preliminary  
824 evidence for the transcription initiation at enhancers before the transcription  
825 activation". These two statements are not backed by convincing data and should be  
826 removed.

827 We thank the reviewer for their careful assessment of the claims. We used all available  
828 SE-gene pairs that were experimentally validated in mouse embryonic stem cells and  
829 could not add more validated pairs.

830  
831 We have made changes to both statements the reviewer indicated and softened the  
832 claim about the order of enhancer-gene transcription to address the reviewer's  
833 concerns.

834  
835 9. Additional concerns:  
836  
837 a. The start of the results section is very dense. It (I think rightfully) introduces AGTuC  
838 and inAGTuC, but it refers to 5 full page Extended Figures before the first main  
839 figure is presented. There is no description of the results in these figures (except  
840 for the very short figure legends) and no discussion. I suggest to add this in a  
841 supplementary document.

842 We thank the reviewer for their thoughtful recommendation to enhance the  
843 readability of our manuscript. The individual panels of these figures are explained  
844 in the first few sections of the supplementary data. By briefly stating the presence  
845 of the work in the main text and indicating the presence of a detailed explanation  
846 in the supplementary file, we wanted to make readers aware of the careful  
847 optimization of methods, which could be helpful in further enhancement of scGRO-  
848 seq in the future. We are happy to reorganize the main and supplementary texts  
849 in the manuscript as per the reviewers' and editors' suggestions.

850  
851 b. The differences of inAGTuC and scGRO-seq profiles along gene bodies in Fig 1b  
852 to PRO-seq profiles are attributed to the absence of high concentrations of a strong  
853 detergent. The authors cite the groHMM paper here, which likely is the wrong  
854 reference?

855 The reviewer might be referring to lines 146-148 in the manuscript, which states -  
856 "However, scGRO-seq is less efficient in capturing nascent RNA from promoter-  
857 proximal pause sites. We attribute this to the reduced run-on efficiency of paused  
858 Pol II in the absence of a high concentration of strong detergent<sup>27</sup>." The reference  
859 #27 in the manuscript is the right reference (Line #453 - Core, L. J. et al. Defining  
860 the status of RNA polymerase at promoters. Cell reports 2, 454 1025–1035). I think  
861 the confusion arose due to the two reference lists - one for the main manuscript  
862 and one for the supplementary file. This confusion will be resolved in the final  
863 publication as the two reference lists will not appear in the same document as they  
864 currently do in the submitted manuscript.

865  
866 c. Ext Fig. 5 says 12, 120 and 1200 cells, text says 100k, 10k and 1k nuclei.  
867 We thank the reviewer for highlighting the ambiguity that arose from our failure to  
868 clearly describe how 12, 120, and 1200 cells per well correspond to 1K, 10K, and  
869 100K total cells, respectively. The main text and the supplementary file have been  
870 amended to resolve the confusion.

871

- 872 d. The text always talks about "reads", while I believe it is "deduplicated reads". I  
873 suggest to refer to them as UMIs.  
874 We have made changes to replace reads with UMIs. We thank the reviewer for  
875 this suggestion.  
876
- 877 e. The manuscript shows a lot of log-log scatterplots. It is not clear where the zeros  
878 are (pseudocounts?), and what the colorscale is showing.  
879 We apologize for the confusion created by the scatterplots in the log-log scale. We  
880 have not used pseudo counts in plotting or analyses. The linear fit is performed on  
881 linear data, and the data points are plotted on the log-log scale for visualization  
882 purposes only. The zeros are considered in the linear fit but are removed from the  
883 plot due to the log transformation of zero, resulting in an infinite value. The scatter  
884 plots are plotted using the 'geom\_pointdensity()' function, where the color scale  
885 indicates the number of neighboring points. The legend title is added to all scatter  
886 plots. We thank the reviewer for bringing this to our attention.  
887
- 888 f. Line 149f: Please show the correlation excluding the promoter-proximal region!  
889 We think the reviewer is referring to the sentences in lines 146-148: "However,  
890 scGRO-seq is less efficient in capturing nascent RNA from promoter-proximal  
891 pause sites. We attribute this to the reduced run-on efficiency of paused Pol II in  
892 the absence of a high concentration of strong detergent." The plot referring to this  
893 description is **Extended Data Figure 7c**. The correlation between scGRO-seq and  
894 PRO-seq in this figure shows gene body regions as indicated in the x-axis and y-  
895 axis, which precisely means the exclusion of the promoter-proximal region.  
896
- 897 g. Fig 1f: "Intron seqFISH (reads per cell)"; it is not reads!  
898 We have changed the reads to counts.  
899
- 900 h. Fig 1g: It is not clear which scRNA-seq data set that is.  
901 We have added the source of the scRNA-seq data to the figure legend. This  
902 information is also present in the External Data section of the supplementary file.  
903
- 904 i. It is not described how the fdrs in "evidence for bursting" for the data from Fig 2b  
905 were estimated.  
906 The false discovery rates in "evidence for bursting" in **Figure 2b** were estimated  
907 by comparing the observed data against the permuted data.  
908
- 909 j. Fig 2c: How was a KS test computed from this? Why does the x axis stop at 2.5kb  
910 if the window is 10kb?  
911 The KS test was computed between the two distributions of distances between  
912 consecutive RNA polymerases between the observed and permuted data, as  
913 shown in **Extended Data Figure 8a** (left panel). **Figure 2c** shows the ratio of RNA  
914 polymerase pairs (observed data over permuted data) in 50 bp bins for ease of  
915 visualization. We show distances up to 2.5 kb to highlight the closely spaced Pol



916  
917

lts (short distance between them). The full data extending up to 10 kb is shown in **Figure R3.9**.

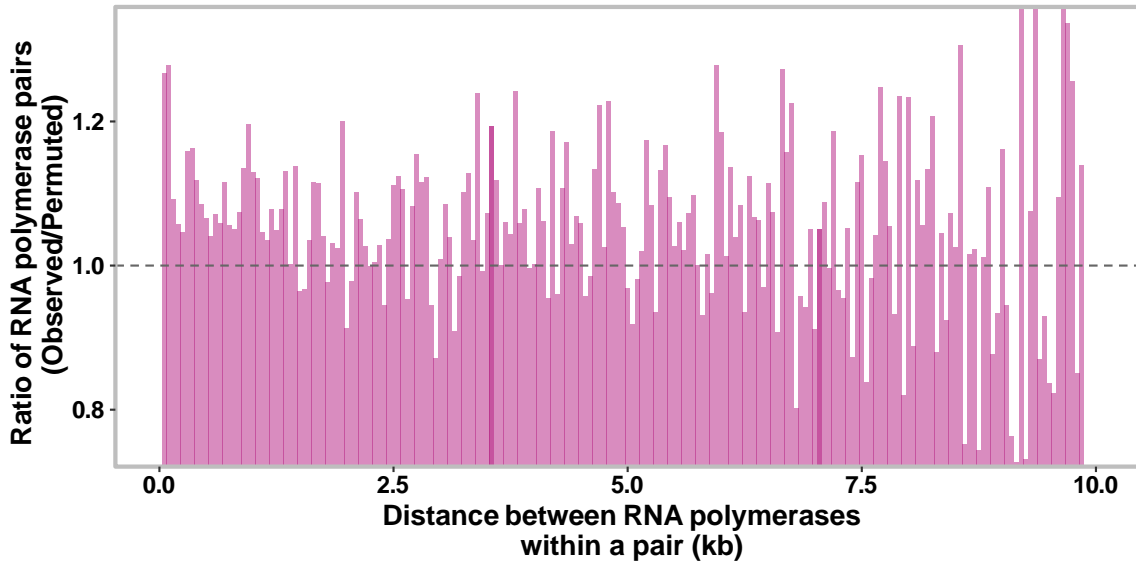

**Figure R3.9. Ratio of the observed distance between consecutive RNA polymerases in the first 10 kb of gene-bodies in individual cells against the permuted data.**

918  
919  
920  
921  
922  
923  
924  
925  
926  
927  
928  
929  
930  
931  
932  
933  
934  
935  
936  
937  
938  
939  
940

- k. Line 227f: "Genes with the TATA element exhibited a larger burst size than genes lacking it, and the presence of the Initiator sequence further increased the burst size" - p values are required to back this claim.  
We thank the reviewer for bringing this oversight to our attention. P-values are provided for the promoter elements comparisons in the main text.
- l. Fig 5a: How were KS tests performed? Why is there a drop by 50% in the left most bin for uncorrelated pairs?  
The asymptotic two-sample Kolmogorov-Smirnov test was performed using the `ks.test()` function in R to examine if the correlated and uncorrelated distributions came from the same distribution. The drop in the leftmost bin was a result of the `geom_histogram()` function in R. The `geom_histogram()` function with `bins = x` and by not stating `xlim` [`geom_histogram(bins = 25, mapping = aes(y = after_stat(density)))`] would result in an unintended plotting behavior as observed in Fig. 5a. We corrected the function to [`geom_histogram(binwidth = 100000, boundary = 0, closed = "right," mapping = aes(y = after_stat(density)))`], which resolves the issue. We thank the reviewer for drawing our attention to this error.
- m. Methods: Better descriptions of the computational approaches in general are required. One example: The provided code hints at a custom definition of transcriptional units using `groHMM`, this is not described. Other example: Were there cells that were filtered out? (Based on Fig. 1c it seems as if cells were filtered

941 by a threshold on features per cell - it true, reporting 1503 features on average per  
942 cell is not reasonable).

943 We apologize for the lack of description of the custom definition of transcriptional  
944 units and thresholds applied for filtering cells. We have added two new sub-  
945 sections, "Filtering Experimental batches and cells" and "Transcription Unit  
946 calling," in the Methods section and incorporated additional explanations in the  
947 main manuscript.

948  
949 Overall, we thank the reviewer for their constructive comments on the  
950 computational analyses and for encouraging us to improve the description of  
951 computational methods. We have made our best attempt to add explanations  
952 where necessary and to enhance the clarity and readability of the method section.  
953 We sincerely believe that these suggestions have improved the manuscript.

954  
955  
956  
957

958 **References:**

- 959 Audibert, A., Weil, D., Dautry, F., 2002. In Vivo Kinetics of mRNA Splicing and  
960 Transport in Mammalian Cells. *Mol. Cell. Biol.* 22, 6706–6718.
- 961 Bainbridge, M.N., Warren, R.L., Hirst, M., Romanuik, T., Zeng, T., Go, A., Delaney, A.,  
962 Griffith, M., Hickenbotham, M., Magrini, V., Mardis, E.R., Sadar, M.D., Siddiqui, A.S.,  
963 Marra, M.A., Jones, S.J., 2006. Analysis of the prostate cancer cell line LNCaP  
964 transcriptome using a sequencing-by-synthesis approach. *BMC Genom.* 7, 246.
- 965 Buenrostro, J.D., Giresi, P.G., Zaba, L.C., Chang, H.Y., Greenleaf, W.J., 2013.  
966 Transposition of native chromatin for fast and sensitive epigenomic profiling of open  
967 chromatin, DNA-binding proteins and nucleosome position. *Nat. Methods* 10, 1213–  
968 1218.
- 969 Buenrostro, J.D., Wu, B., Litzenburger, U.M., Ruff, D., Gonzales, M.L., Snyder, M.P.,  
970 Chang, H.Y., Greenleaf, W.J., 2015. Single-cell chromatin accessibility reveals  
971 principles of regulatory variation. *Nature* 523, 486–490.
- 972 Byun, J.S., Fufa, T.D., Wakano, C., Fernandez, A., Haggerty, C.M., Sung, M.-H.,  
973 Gardner, K., 2012. ELL facilitates RNA polymerase II pause site entry and release.  
974 *Nature communications* 3, 633.
- 975 Chari, T., Pachter, L., 2023. The specious art of single-cell genomics. *PLOS Comput.*  
976 *Biol.* 19, e1011288.
- 977 CLEMENT, J.Q., QIAN, L., KAPLINSKY, N., WILKINSON, M.F., 1999. The stability and  
978 fate of a spliced intron from vertebrate cells. *RNA* 5, 206–220.
- 979 Core, L.J., Waterfall, J.J., Lis, J.T., 2008. Nascent RNA sequencing reveals widespread  
980 pausing and divergent initiation at human promoters. *Science* 322, 1845–1848.
- 981 Coulon, A., Ferguson, M.L., Turriz, V. de, Palangat, M., Chow, C.C., Larson, D.R.,  
982 2014. Kinetic competition during the transcription cycle results in stochastic RNA  
983 processing. *eLife* 3, e03939.
- 984 Cui, Y., Irudayaraj, J., 2015. Inside single cells: quantitative analysis with advanced  
985 optics and nanomaterials. *Wiley Interdiscip. Rev.: Nanomed. Nanobiotechnology* 7,  
986 387–407.
- 987 Hu, S., Metcalf, E., Mahat, D.B., Chan, L., Sohal, N., Chakraborty, M., Hamilton, M.,  
988 Singh, Arundeeep, Singh, Abhyudai, Lees, J.A., Sharp, P.A., Garg, S., 2022.  
989 Transcription factor antagonism regulates heterogeneity in embryonic stem cell states.  
990 *Mol. Cell* 82, 4410-4427.e12.
- 991 Klein, A.M., Mazutis, L., Akartuna, I., Tallapragada, N., Veres, A., Li, V., Peshkin, L.,  
992 Weitz, D.A., Kirschner, M.W., 2015. Droplet Barcoding for Single-Cell Transcriptomics  
993 Applied to Embryonic Stem Cells. *Cell* 161, 1187–1201.
- 994 Landry, J.J.M., Pyl, P.T., Rausch, T., Zichner, T., Tekkedil, M.M., Stütz, A.M., Jauch, A.,  
995 Aiyar, R.S., Pau, G., Delhomme, N., Gagneur, J., Korbel, J.O., Huber, W., Steinmetz,  
996 L.M., 2013. The Genomic and Transcriptomic Landscape of a HeLa Cell Line. *G3:  
997 GenesGenomesGenet.* 3, 1213–1224.
- 998 Macosko, E.Z., Basu, A., Satija, R., Nemesh, J., Shekhar, K., Goldman, M., Tirosh, I.,  
999 Bialas, A.R., Kamitaki, N., Martersteck, E.M., Trombetta, J.J., Weitz, D.A., Sanes, J.R.,  
1000 Shalek, A.K., Regev, A., McCarroll, S.A., 2015. Highly Parallel Genome-wide  
1001 Expression Profiling of Individual Cells Using Nanoliter Droplets. *Cell* 161, 1202–1214.
- 1002 Macville, M., Schröck, E., Padilla-Nash, H., Keck, C., Ghadimi, B.M., Zimonjic, D.,  
1003 Popescu, N., Ried, T., 1999. Comprehensive and definitive molecular cytogenetic

1004 characterization of HeLa cells by spectral karyotyping. *Cancer Res.* 59, 141–50.  
1005 Marinov, G.K., Williams, B.A., McCue, K., Schroth, G.P., Gertz, J., Myers, R.M., Wold,  
1006 B.J., 2014. From single-cell to cell-pool transcriptomes: Stochasticity in gene expression  
1007 and RNA splicing. *Genome Res.* 24, 496–510.  
1008 Neugebauer, K.M., 2019. Nascent RNA and the Coordination of Splicing with  
1009 Transcription. *Cold Spring Harb. Perspect. Biol.* 11, a032227.  
1010 Patange, S., Ball, D.A., Wan, Y., Karpova, T.S., Girvan, M., Levens, D., Larson, D.R.,  
1011 2022. MYC amplifies gene expression through global changes in transcription factor  
1012 dynamics. *Cell Rep.* 38, 110292.  
1013 Rabani, M., Levin, J.Z., Fan, L., Adiconis, X., Raychowdhury, R., Garber, M., Gnirke, A.,  
1014 Nusbaum, C., Hacohen, N., Friedman, N., Amit, I., Regev, A., 2011. Metabolic labeling  
1015 of RNA uncovers principles of RNA production and degradation dynamics in  
1016 mammalian cells. *Nat. Biotechnol.* 29, 436–442.  
1017 Rabani, M., Raychowdhury, R., Jovanovic, M., Rooney, M., Stumpo, D.J., Pauli, A.,  
1018 Hacohen, N., Schier, A.F., Blackshear, P.J., Friedman, N., Amit, I., Regev, A., 2014.  
1019 High-Resolution Sequencing and Modeling Identifies Distinct Dynamic RNA Regulatory  
1020 Strategies. *Cell* 159, 1698–1710.  
1021 Shah, S., Takei, Y., Zhou, W., Lubeck, E., Yun, J., Eng, C.-H.L., Koulena, N., Cronin,  
1022 C., Karp, C., Liaw, E.J., Amin, M., Cai, L., 2018. Dynamics and Spatial Genomics of the  
1023 Nascent Transcriptome by Intron seqFISH. *Cell*.  
1024 Singh, J., Padgett, R.A., 2009. Rates of in situ transcription and splicing in large human  
1025 genes. *Nature structural & molecular biology* 16, 1128–1133.  
1026 Tang, F., Barbacioru, C., Wang, Y., Nordman, E., Lee, C., Xu, N., Wang, X., Bodeau, J.,  
1027 Tuch, B.B., Siddiqui, A., Lao, K., Surani, M.A., 2009. mRNA-Seq whole-transcriptome  
1028 analysis of a single cell. *Nat Methods* 6, 377–382.  
1029 Tome, J.M., Tippens, N.D., Lis, J.T., 2018. Single-molecule nascent RNA sequencing  
1030 identifies regulatory domain architecture at promoters and enhancers. *Nature Genetics*  
1031 322, 1845.

## **Reviewer Reports on the First Revision:**

Referees' comments:

Referee #1 (Remarks to the Author):

The authors have responded to our concerns and suggestions in a thorough manner, and they have made significant changes that have improved the manuscript. Some of the requests for additional experiments were seen by the authors as beyond the scope of the study or would significantly delay publication. I appreciate their arguments and agree that it will be useful to the scientific community to have this published as soon as possible.

I have a very minor point below that the authors may want to check.

1. Line 255. Authors please check if references 48 and 49 belong before the comma.

Referee #2 (Remarks to the Author):

The authors have performed additional experiments that have nicely addressed my concerns about controlling for the identity of the propargyl nucleotide have any outsized effect on the click chemistry or reverse transcription. I support publication.

Referee #2 (Remarks on code availability):

This is outside of my area.

Referee #3 (Remarks to the Author):

The authors have addressed most of my points in a satisfactory manner. Based on their explanation they now gave in their replies I could now much better understand the (important) details of their data analysis methods. Unfortunately, not all of these explanations have found their way into the manuscript and one of my concerns remains. However, I am confident that my remaining concerns can be addressed by revising the text.

ad 1a) In their reply the authors claimed that "the median time required for introns to be spliced ranges from 5 to 10 minutes". This reflects only part of the literature. In the review from Karla Neugebauer (referenced by the authors in their reply) it ranges from 15 sec to 14 min, with most reports being below 5 min. If 15 sec to 14 min are used for the same calculation as done by the authors in their reply, Pol II would travel less than 1 kb or up to 35 kb during the time the intron can be detected by seqFISH. Moreover, the time to transcribe the intron, the time it takes until fluorescent probes detect introns, and the intron degradation kinetics will further increase the uncertainty in this travelling distance Pol II. In addition, genes with transcription units shorter than this distance would further bias the estimate of the capture efficiency. Thus, the 10% claimed by the

authors rather might be "something in between 1% and 20%". This number of 10% might not be "critical" here (as claimed by the authors, and I agree with that), but it might be for future studies involving scGRO-seq that will just refer back to this paper and assume the 10% to be true. This limitation should be mentioned in the discussion.

I am also a bit puzzled by the fact that the slope is now higher after restricting the analysis to the first 20 kb (0.26 as opposed to 0.23). Is this an effect of now not using an intercept term? Which parts of the transcription unit is used for which analysis must be clearly described in the methods (the same is true for the detail that the regressions are done without log).

ad 3) I appreciate the clarification by the authors especially under 6b. My understanding from the previous version was that in the gene x cell count matrix, each row was permuted randomly. Now this is better described in the main text, but a detailed description in the Methods section would avoid such a confusion and should be included.

1 **Author Rebuttals to First Revision:**

2 **Single-cell nascent RNA sequencing unveils coordinated global transcription**

3  
4 Manuscript #: 2023-09-16626A

5 First Author: Dig Bijay Mahat ([mahat@mit.edu](mailto:mahat@mit.edu))

6 Last Author: Phillip A. Sharp ([sharppa@mit.edu](mailto:sharppa@mit.edu))

7  
8 **Response to Referees' comments to our initial response:**

9  
10 **Referee #1 (Remarks to the Author):**

11 The authors have responded to our concerns and suggestions in a thorough manner, and  
12 they have made significant changes that have improved the manuscript. Some of the  
13 requests for additional experiments were seen by the authors as beyond the scope of the  
14 study or would significantly delay publication. I appreciate their arguments and agree that  
15 it will be useful to the scientific community to have this published as soon as possible.

16 *We thank the reviewer for their understanding and support. We are pleased that the  
17 manuscript meets their expectations and look forward to its contribution to the scientific  
18 community.*

19  
20 I have a very minor point below that the authors may want to check. Line 255. Authors  
21 please check if references 48 and 49 belong before the comma.

22 *We thank the reviewer for pointing out this error. The references belong before the  
23 comma, which has been fixed in the manuscript.*

24  
25  
26 **Referee #2 (Remarks to the Author):**

27 The authors have performed additional experiments that have nicely addressed my  
28 concerns about controlling for the identity of the propargyl nucleotide have any outsized  
29 effect on the click chemistry or reverse transcription. I support publication.

30 *We appreciate the reviewer's support for publication and thank them for acknowledging  
31 the efforts made to address their concerns.*

32  
33  
34 **Referee #3 (Remarks to the Author):**

35 The authors have addressed most of my points in a satisfactory manner. Based on their  
36 explanation they now gave in their replies I could now much better understand the  
37 (important) details of their data analysis methods. Unfortunately, not all of these  
38 explanations have found their way into the manuscript and one of my concerns remains.  
39 However, I am confident that my remaining concerns can be addressed by revising the  
40 text.

41 1) In their reply the authors claimed that "the median time required for introns to be spliced  
42 ranges from 5 to 10 minutes". This reflects only part of the literature. In the review from  
43 Karla Neugebauer (referenced by the authors in their reply) it ranges from 15 sec to 14  
44 min, with most reports being below 5 min. If 15 sec to 14 min are used for the same  
45 calculation as done by the authors in their reply, Pol II would travel less than 1 kb or up

46 to 35 kb during the time the intron can be detected by seqFISH. Moreover, the time to  
47 transcribe the intron, the time it takes until fluorescent probes detect introns, and the intron  
48 degradation kinetics will further increase the uncertainty in this travelling distance Pol II.  
49 In addition, genes with transcription units shorter than this distance would further bias the  
50 estimate of the capture efficiency. Thus, the 10% claimed by the authors rather might be  
51 "something in between 1% and 20%". This number of 10% might not be "critical" here (as  
52 claimed by the authors, and I agree with that), but it might be for future studies involving  
53 scGRO-seq that will just refer back to this paper and assume the 10% to be true. This  
54 limitation should be mentioned in the discussion.

55 We thank the reviewer for their careful deliberation of the capture efficiency estimated in  
56 our study. We agree that the 10% is an average approximation. We have, therefore,  
57 added a phrase, "This estimate is based on the 8 minutes of median time required for  
58 intron to be spliced out once it is transcribed, which ranges from 5 to 10 minutes according  
59 to several studies using diverse methods<sup>58-64</sup>. Thus, the capture efficiency of 10% is an  
60 average approximation and can vary among cells and batches" in the manuscript to reflect  
61 this approximation as per the reviewer's request.

62  
63 2) I am also a bit puzzled by the fact that the slope is now higher after restricting the  
64 analysis to the first 20 kb (0.26 as opposed to 0.23). Is this an effect of now not using an  
65 intercept term? Which parts of the transcription unit is used for which analysis must be  
66 clearly described in the methods (the same is true for the detail that the regressions are  
67 done without log).

68 The use of 20 kb, instead of 10 kb, increases the number of scGRO-seq reads used in  
69 correlation analysis and, therefore, slightly increases the slope, reflecting that the scGRO-  
70 seq UMIs per gene compared to intron seqFISH UMIs per gene are somewhat improved.

71  
72 We thank the reviewer for their concern about the plots' description. The figure legends  
73 are modified to indicate that "UMIs from the 500 bp regions from each end of the genes  
74 and 250 bp regions from each end of the enhancers were removed to only include nascent  
75 RNA from elongating RNA polymerases, and the data was plotted on a log-log scale to  
76 show the range of data distribution" where relevant. Similarly, we have modified the  
77 scGRO-seq vs intron seqFISH regression with "Correlation between scGRO-seq UMIs  
78 per cell from up to the first 20 kb of genes and intron seqFISH counts per cell in the body  
79 of genes used in the intron seqFISH study (n = 9,666)".

80  
81 3) I appreciate the clarification by the authors especially under 6b. My understanding from  
82 the previous version was that in the gene x cell count matrix, each row was permuted  
83 randomly. Now this is better described in the main text, but a detailed description in the  
84 Methods section would avoid such a confusion and should be included.

85 We are delighted to know that our response has addressed the reviewer's confusion  
86 regarding the permutation method. We have improved its clarity in the Methods section  
87 and in the main text where applicable.

88



1091 characterization of HeLa cells by spectral karyotyping. *Cancer Res.* 59, 141–50.  
1092 Marinov, G.K., Williams, B.A., McCue, K., Schroth, G.P., Gertz, J., Myers, R.M., Wold,  
1093 B.J., 2014. From single-cell to cell-pool transcriptomes: Stochasticity in gene expression  
1094 and RNA splicing. *Genome Res.* 24, 496–510.  
1095 Neugebauer, K.M., 2019. Nascent RNA and the Coordination of Splicing with  
1096 Transcription. *Cold Spring Harb. Perspect. Biol.* 11, a032227.  
1097 Patange, S., Ball, D.A., Wan, Y., Karpova, T.S., Girvan, M., Levens, D., Larson, D.R.,  
1098 2022. MYC amplifies gene expression through global changes in transcription factor  
1099 dynamics. *Cell Rep.* 38, 110292.  
1100 Rabani, M., Levin, J.Z., Fan, L., Adiconis, X., Raychowdhury, R., Garber, M., Gnirke, A.,  
1101 Nusbaum, C., Hacohen, N., Friedman, N., Amit, I., Regev, A., 2011. Metabolic labeling  
1102 of RNA uncovers principles of RNA production and degradation dynamics in  
1103 mammalian cells. *Nat. Biotechnol.* 29, 436–442.  
1104 Rabani, M., Raychowdhury, R., Jovanovic, M., Rooney, M., Stumpo, D.J., Pauli, A.,  
1105 Hacohen, N., Schier, A.F., Blackshear, P.J., Friedman, N., Amit, I., Regev, A., 2014.  
1106 High-Resolution Sequencing and Modeling Identifies Distinct Dynamic RNA Regulatory  
1107 Strategies. *Cell* 159, 1698–1710.  
1108 Shah, S., Takei, Y., Zhou, W., Lubeck, E., Yun, J., Eng, C.-H.L., Koulena, N., Cronin,  
1109 C., Karp, C., Liaw, E.J., Amin, M., Cai, L., 2018. Dynamics and Spatial Genomics of the  
1110 Nascent Transcriptome by Intron seqFISH. *Cell*.  
1111 Singh, J., Padgett, R.A., 2009. Rates of in situ transcription and splicing in large human  
1112 genes. *Nature structural & molecular biology* 16, 1128–1133.  
1113 Tang, F., Barbacioru, C., Wang, Y., Nordman, E., Lee, C., Xu, N., Wang, X., Bodeau, J.,  
1114 Tuch, B.B., Siddiqui, A., Lao, K., Surani, M.A., 2009. mRNA-Seq whole-transcriptome  
1115 analysis of a single cell. *Nat Methods* 6, 377–382.  
1116 Tome, J.M., Tippens, N.D., Lis, J.T., 2018. Single-molecule nascent RNA sequencing  
1117 identifies regulatory domain architecture at promoters and enhancers. *Nature Genetics*  
1118 322, 1845.
